# Supplementary material for: Silencing of LOC389641 impairs cell proliferation and induces autophagy via EGFR/MET signaling in lung adenocarcinoma
Source: Aging (Albany NY). 2020 Dec 9;13(2):2539–52. doi: 10.18632/aging.202286 (PMC7880380; doi:10.18632/aging.202286)
Supplement: Supplementary Table 1 [file aging-13-202286-s001.xlsx]

## Sheet: positive correlated gene list
Supplementary Table 1. Positive correlated gene list.
Okayama data set					LOC389641
positive correlated gene list					244886_at
					226 Ads
Probe Set ID	Gene Title	Gene Symbol	Chromosomal Location	Ensembl	r
244886_at	uncharacterized LOC389641	LOC389641	chr8p21.3	ENSG00000246582	1
241371_at	tumor necrosis factor receptor superfamily, member 10a	TNFRSF10A	chr8p21	ENSG00000104689	0.679942
202680_at	general transcription factor IIE, polypeptide 2, beta 34kDa	GTF2E2	chr8p12	ENSG00000197265	0.631346
1552648_a_at	tumor necrosis factor receptor superfamily, member 10a	TNFRSF10A	chr8p21	ENSG00000104689	0.625479
219148_at	PDZ binding kinase	PBK	chr8p21.2	ENSG00000168078	0.623955
225378_at	vacuolar protein sorting 37 homolog A (S. cerevisiae)	VPS37A	chr8p22	ENSG00000155975	0.621251
208361_s_at	polymerase (RNA) III (DNA directed) polypeptide D, 44kDa	POLR3D	chr8q21	ENSG00000168495	0.620547
222525_s_at	coiled-coil domain containing 25	CCDC25	chr8p21.1	ENSG00000147419	0.598006
236957_at	cell division cycle associated 2	CDCA2	chr8p21.2	ENSG00000184661	0.595213
231775_at	tumor necrosis factor receptor superfamily, member 10a	TNFRSF10A	chr8p21	ENSG00000104689	0.592227
202996_at	polymerase (DNA-directed), delta 4, accessory subunit	POLD4	chr11q13	ENSG00000175482	0.589668
226661_at	cell division cycle associated 2	CDCA2	chr8p21.2	ENSG00000184661	0.587272
235178_x_at	establishment of cohesion 1 homolog 2 (S. cerevisiae)	ESCO2	chr8p21.1	ENSG00000171320	0.58474
219124_at	TELO2 interacting protein 2	TTI2	chr8p12	ENSG00000129696	0.58205
235588_at	establishment of cohesion 1 homolog 2 (S. cerevisiae)	ESCO2	chr8p21.1	ENSG00000171320	0.579054
1552344_s_at	CCR4-NOT transcription complex, subunit 7	CNOT7	chr8p22-p21.3	ENSG00000198791	0.571364
202313_at	protein phosphatase 2, regulatory subunit B, alpha	PPP2R2A	chr8p21.2	ENSG00000221914	0.559934
222037_at	minichromosome maintenance complex component 4	MCM4	chr8q11.2	ENSG00000104738	0.558501
230642_at	---	---	---	ENSG00000260963	0.557776
226416_at	exoribonuclease 1	ERI1	chr8p23.1	ENSG00000104626	0.550742
212166_at	exportin 7	XPO7	chr8p21	ENSG00000130227	0.54462
205024_s_at	RAD51 homolog (S. cerevisiae)	RAD51	chr15q15.1	ENSG00000051180	0.541223
203362_s_at	MAD2 mitotic arrest deficient-like 1 (yeast)	MAD2L1	chr4q27	ENSG00000164109	0.540979
209773_s_at	ribonucleotide reductase M2	RRM2	chr2p25-p24	ENSG00000171848	0.538267
218299_at	chromosome 11 open reading frame 24	C11orf24	chr11q13	ENSG00000171067	0.537962
201629_s_at	acid phosphatase 1, soluble	ACP1	chr2p25	ENSG00000143727	0.536736
202503_s_at	KIAA0101	KIAA0101	chr15q22.31	ENSG00000166803	0.535968
223478_at	translocase of inner mitochondrial membrane 8 homolog B (yeast)	TIMM8B	chr11q23.1-q23.2	ENSG00000150779	0.535857
230021_at	chromosome 15 open reading frame 42	C15orf42	chr15q26.1	ENSG00000140534	0.535568
221539_at	eukaryotic translation initiation factor 4E binding protein 1	EIF4EBP1	chr8p12	ENSG00000187840	0.532601
202595_s_at	leptin receptor overlapping transcript-like 1	LEPROTL1	chr8p21	ENSG00000104660	0.53187
212313_at	charged multivesicular body protein 7	CHMP7	chr8p21.3	ENSG00000147457	0.531667
223369_at	N-terminal Xaa-Pro-Lys N-methyltransferase 1	NTMT1	chr9q34.11	ENSG00000148335	0.531352
203418_at	cyclin A2	CCNA2	chr4q25-q31	ENSG00000145386	0.530522
222981_s_at	RAB10, member RAS oncogene family	RAB10	chr2p23.3	ENSG00000084733	0.529516
219921_s_at	dedicator of cytokinesis 5	DOCK5	chr8p21.2	ENSG00000147459	0.528856
228323_at	cancer susceptibility candidate 5	CASC5	chr15q14	ENSG00000137812	0.528393
205770_at	glutathione reductase	GSR	chr8p21.1	ENSG00000104687	0.528357
218083_at	prostaglandin E synthase 2	PTGES2	chr9q34.11	ENSG00000148334	0.528354
222036_s_at	minichromosome maintenance complex component 4	MCM4	chr8q11.2	ENSG00000104738	0.526095
213599_at	Opa interacting protein 5	OIP5	chr15q15.1	ENSG00000104147	0.52599
203534_at	LSM1 homolog, U6 small nuclear RNA associated (S. cerevisiae)	LSM1	chr8p11.2	ENSG00000175324	0.52351
201688_s_at	tumor protein D52	TPD52	chr8q21	ENSG00000076554	0.522683
200853_at	H2A histone family, member Z	H2AFZ	chr4q24	ENSG00000164032	0.522072
226686_at	CDGSH iron sulfur domain 2	CISD2	chr4q24	ENSG00000145354	0.520263
221648_s_at	agmatine ureohydrolase (agmatinase)	AGMAT	chr1p36.21	---	0.518633
203755_at	budding uninhibited by benzimidazoles 1 homolog beta (yeast)	BUB1B	chr15q15	ENSG00000156970	0.517882
223785_at	Fanconi anemia, complementation group I	FANCI	chr15q26.1	ENSG00000140525	0.517388
218039_at	nucleolar and spindle associated protein 1	NUSAP1	chr15q15.1	ENSG00000137804	0.516092
201013_s_at	phosphoribosylaminoimidazole carboxylase, phosphoribosylaminoimidazole succinocarboxamide synthetase	PAICS	chr4q12	ENSG00000128050	0.515251
209825_s_at	microRNA 3658 /// uridine-cytidine kinase 2	MIR3658 /// UCK2	chr1q23	ENSG00000143179	0.515217
218726_at	Holliday junction recognition protein	HJURP	chr2q37.1	ENSG00000123485	0.514937
212023_s_at	antigen identified by monoclonal antibody Ki-67	MKI67	chr10q26.2	ENSG00000148773	0.51487
212322_at	sphingosine-1-phosphate lyase 1	SGPL1	chr10q21	ENSG00000166224	0.514787
236906_x_at	importin 5	IPO5	chr13q32.2	ENSG00000065150	0.514098
223568_s_at	phosphatidic acid phosphatase type 2 domain containing 1B	PPAPDC1B	chr8p11.23	ENSG00000147535	0.514019
224753_at	cell division cycle associated 5	CDCA5	chr11q12.1	ENSG00000146670	0.512955
221336_at	atonal homolog 1 (Drosophila)	ATOH1	chr4q22	ENSG00000172238	0.512929
215227_x_at	acid phosphatase 1, soluble	ACP1	chr2p25	ENSG00000143727	0.51238
52164_at	chromosome 11 open reading frame 24	C11orf24	chr11q13	ENSG00000171067	0.512266
221094_s_at	elongation protein 3 homolog (S. cerevisiae)	ELP3	chr8p21.1	ENSG00000134014	0.512115
204768_s_at	flap structure-specific endonuclease 1	FEN1	chr11q12	ENSG00000168496	0.511747
238460_at	family with sequence similarity 83, member A	FAM83A	chr8q24.13	ENSG00000147689	0.511257
212141_at	minichromosome maintenance complex component 4	MCM4	chr8q11.2	ENSG00000104738	0.510594
227928_at	PARP1 binding protein	PARPBP	chr12q23.2	ENSG00000185480	0.510453
204015_s_at	dual specificity phosphatase 4	DUSP4	chr8p12-p11	ENSG00000120875	0.510225
221436_s_at	cell division cycle associated 3	CDCA3	chr12p13	ENSG00000111665	0.510097
218009_s_at	protein regulator of cytokinesis 1	PRC1	chr15q26.1	ENSG00000198901	0.509464
239586_at	family with sequence similarity 83, member A	FAM83A	chr8q24.13	ENSG00000147689	0.508116
202705_at	cyclin B2	CCNB2	chr15q22.2	ENSG00000157456	0.507086
219879_s_at	chromosome 17 open reading frame 53	C17orf53	chr17q21.31	ENSG00000125319	0.506108
210052_s_at	TPX2, microtubule-associated, homolog (Xenopus laevis)	TPX2	chr20q11.2	ENSG00000088325	0.505693
223307_at	cell division cycle associated 3	CDCA3	chr12p13	ENSG00000111665	0.504295
202954_at	ubiquitin-conjugating enzyme E2C	UBE2C	chr20q13.12	ENSG00000175063	0.504125
1555274_a_at	ethanolaminephosphotransferase 1 (CDP-ethanolamine-specific)	EPT1	chr2p23.3	ENSG00000138018	0.503906
211595_s_at	mitochondrial ribosomal protein S11	MRPS11	chr15q25	ENSG00000181991	0.503765
227165_at	spindle and kinetochore associated complex subunit 3	SKA3	chr13q12.11	ENSG00000165480	0.503622
205644_s_at	small nuclear ribonucleoprotein polypeptide G	SNRPG	chr2p13.3	ENSG00000143977 /// ENSG00000224543	0.50326
238741_at	family with sequence similarity 83, member A	FAM83A	chr8q24.13	ENSG00000147689	0.502685
225653_at	transforming growth factor, beta receptor associated protein 1	TGFBRAP1	chr2q12.1	ENSG00000135966	0.501663
204444_at	kinesin family member 11	KIF11	chr10q24.1	ENSG00000138160	0.501277
219162_s_at	mitochondrial ribosomal protein L11	MRPL11	chr11q13.3	ENSG00000174547	0.501242
211697_x_at	partner of NOB1 homolog (S. cerevisiae)	PNO1	chr2p14	ENSG00000115946	0.50086
220647_s_at	coiled-coil-helix-coiled-coil-helix domain containing 8	CHCHD8	chr11q13.4	ENSG00000181924	0.500465
214941_s_at	PRP40 pre-mRNA processing factor 40 homolog A (S. cerevisiae)	PRPF40A	chr2q23.3	ENSG00000196504	0.5002
203968_s_at	cell division cycle 6 homolog (S. cerevisiae)	CDC6	chr17q21.3	ENSG00000094804	0.499582
218115_at	ASF1 anti-silencing function 1 homolog B (S. cerevisiae)	ASF1B	chr19p13.12	ENSG00000105011	0.499404
203941_at	integrator complex subunit 9	INTS9	chr8p21.1	ENSG00000104299	0.498359
221678_at	abhydrolase domain containing 6	ABHD6	chr3p14.3	---	0.498224
205436_s_at	H2A histone family, member X	H2AFX	chr11q23.3	ENSG00000188486	0.497944
213911_s_at	H2A histone family, member Z	H2AFZ	chr4q24	ENSG00000164032	0.49792
236312_at	---	---	---	---	0.497644
218250_s_at	CCR4-NOT transcription complex, subunit 7	CNOT7	chr8p22-p21.3	ENSG00000198791	0.497319
1564064_a_at	ATPase, class VI, type 11B	ATP11B	chr3q27	ENSG00000058063	0.497108
1554768_a_at	MAD2 mitotic arrest deficient-like 1 (yeast)	MAD2L1	chr4q27	ENSG00000164109	0.49701
212021_s_at	antigen identified by monoclonal antibody Ki-67	MKI67	chr10q26.2	ENSG00000148773	0.496962
203967_at	cell division cycle 6 homolog (S. cerevisiae)	CDC6	chr17q21.3	ENSG00000094804	0.496931
218542_at	centrosomal protein 55kDa	CEP55	chr10q23.33	ENSG00000138180	0.496868
218777_at	receptor accessory protein 4	REEP4	chr8p21.3	---	0.495935
201690_s_at	tumor protein D52	TPD52	chr8q21	ENSG00000076554	0.495776
208052_x_at	carcinoembryonic antigen-related cell adhesion molecule 3	CEACAM3	chr19q13.2	ENSG00000170956	0.495668
205733_at	Bloom syndrome, RecQ helicase-like	BLM	chr15q26.1	ENSG00000197299	0.495535
230362_at	inositol polyphosphate-5-phosphatase F	INPP5F	chr10q26.11	ENSG00000198825	0.495369
231599_x_at	D4, zinc and double PHD fingers family 1	DPF1	chr19q13.2	ENSG00000011332	0.49516
234465_at	essential meiotic endonuclease 1 homolog 1 (S. pombe)	EME1	chr17q21.33	ENSG00000154920	0.494169
210160_at	platelet-activating factor acetylhydrolase 1b, catalytic subunit 2 (30kDa)	PAFAH1B2	chr11q23	ENSG00000168092	0.493734
228868_x_at	Chromatin licensing and DNA replication factor 1	CDT1	chr16q24.3	---	0.493463
205394_at	checkpoint kinase 1	CHEK1	chr11q24.2	ENSG00000149554	0.49346
64486_at	coronin, actin binding protein, 1B	CORO1B	chr11q13.2	ENSG00000172725	0.49341
203270_at	deoxythymidylate kinase (thymidylate kinase)	DTYMK	chr2q37.3	ENSG00000168393	0.493088
226088_at	zinc finger, DHHC-type containing 12	ZDHHC12	chr9q34.11	ENSG00000160446	0.493062
219650_at	excision repair cross-complementing rodent repair deficiency, complementation group 6-like	ERCC6L	chrXq13.1	ENSG00000186871	0.492873
226150_at	phosphatidic acid phosphatase type 2 domain containing 1B	PPAPDC1B	chr8p11.23	ENSG00000147535	0.492656
225609_at	glutathione reductase	GSR	chr8p21.1	ENSG00000104687	0.492585
210789_x_at	carcinoembryonic antigen-related cell adhesion molecule 3	CEACAM3	chr19q13.2	ENSG00000170956	0.492516
222528_s_at	solute carrier family 25 (mitochondrial iron transporter), member 37	SLC25A37	chr8p21.2	ENSG00000147454	0.491743
219918_s_at	asp (abnormal spindle) homolog, microcephaly associated (Drosophila)	ASPM	chr1q31	ENSG00000066279	0.490935
243894_at	solute carrier family 41, member 2	SLC41A2	chr12q23.3	ENSG00000136052	0.490878
200913_at	protein phosphatase, Mg2+/Mn2+ dependent, 1G	PPM1G	chr2p23.3	ENSG00000115241	0.490629
219472_at	centromere protein O	CENPO	chr2p23.3	ENSG00000138092	0.490619
234954_at	---	---	---	ENSG00000226540	0.490373
201890_at	ribonucleotide reductase M2	RRM2	chr2p25-p24	ENSG00000171848	0.490338
203764_at	discs, large (Drosophila) homolog-associated protein 5	DLGAP5	chr14q22.3	ENSG00000126787	0.490242
204887_s_at	polo-like kinase 4	PLK4	chr4q28	ENSG00000142731	0.490147
230363_s_at	inositol polyphosphate-5-phosphatase F	INPP5F	chr10q26.11	ENSG00000198825	0.489759
225119_at	charged multivesicular body protein 4B	CHMP4B	chr20q11.22	ENSG00000101421	0.489655
222555_s_at	mitochondrial ribosomal protein L44	MRPL44	chr2q36.1	ENSG00000135900	0.489329
201489_at	peptidylprolyl isomerase F	PPIF	chr10q22-q23	ENSG00000108179	0.488966
1552680_a_at	cancer susceptibility candidate 5	CASC5	chr15q14	ENSG00000137812	0.488855
218662_s_at	non-SMC condensin I complex, subunit G	NCAPG	chr4p15.33	ENSG00000109805	0.488536
226980_at	DEP domain containing 1B	DEPDC1B	chr5q12.1	ENSG00000035499	0.487385
217691_x_at	solute carrier family 16, member 3 (monocarboxylic acid transporter 4)	SLC16A3	chr17q25	ENSG00000141526	0.487308
219978_s_at	nucleolar and spindle associated protein 1	NUSAP1	chr15q15.1	ENSG00000137804	0.487224
219592_at	microcephalin 1	MCPH1	chr8p23.1	ENSG00000147316	0.487158
234725_s_at	sema domain, immunoglobulin domain (Ig), transmembrane domain (TM) and short cytoplasmic domain, (semaphorin) 4B	SEMA4B	chr15q25	ENSG00000185033	0.487073
203931_s_at	mitochondrial ribosomal protein L12	MRPL12	chr17q25	ENSG00000183048 /// ENSG00000262660 /// ENSG00000262814	0.486877
218357_s_at	translocase of inner mitochondrial membrane 8 homolog B (yeast)	TIMM8B	chr11q23.1-q23.2	ENSG00000150779	0.486388
225777_at	suppressor APC domain containing 2	SAPCD2	chr9q34.3	ENSG00000186193	0.486326
201298_s_at	MOB kinase activator 1A	MOB1A	chr2p13.1	ENSG00000114978	0.4861
218774_at	decapping enzyme, scavenger	DCPS	chr11q24.2	ENSG00000110063	0.485787
224483_s_at	major facilitator superfamily domain containing 9	MFSD9	chr2q12.1	ENSG00000135953	0.485545
239002_at	asp (abnormal spindle) homolog, microcephaly associated (Drosophila)	ASPM	chr1q31	ENSG00000066279	0.485413
232160_s_at	TNFAIP3 interacting protein 2	TNIP2	chr4p16.3	ENSG00000168884	0.485127
204856_at	UDP-GlcNAc:betaGal beta-1,3-N-acetylglucosaminyltransferase 3	B3GNT3	chr19p13.1	ENSG00000179913	0.485102
223416_at	splicing factor 3B, 14 kDa subunit	SF3B14	chr2pter-p25.1	ENSG00000115128	0.484862
226175_at	tetratricopeptide repeat domain 9C	TTC9C	chr11q12.3	ENSG00000162222	0.484228
220651_s_at	minichromosome maintenance complex component 10	MCM10	chr10p13	ENSG00000065328	0.483876
218355_at	kinesin family member 4A	KIF4A	chrXq13.1	ENSG00000090889	0.483646
224376_s_at	chromosome 20 open reading frame 24 /// TGIF2-C20orf24 readthrough	C20orf24 /// TGIF2-C20ORF24	chr20q /// chr20q11.23	ENSG00000101084 /// ENSG00000259399	0.483618
213008_at	Fanconi anemia, complementation group I	FANCI	chr15q26.1	ENSG00000140525	0.483539
204603_at	exonuclease 1	EXO1	chr1q42-q43	ENSG00000174371	0.482873
202095_s_at	baculoviral IAP repeat containing 5	BIRC5	chr17q25	ENSG00000089685	0.482863
217365_at	PRAME family member 11	PRAMEF11	chr1p36.21	ENSG00000204513	0.48267
231078_at	solute carrier family 25 (mitochondrial iron transporter), member 37	SLC25A37	chr8p21.2	ENSG00000147454	0.482424
1569322_at	uncharacterized LOC439990	LOC439990	chr10q22.3	ENSG00000237523	0.482158
212022_s_at	antigen identified by monoclonal antibody Ki-67	MKI67	chr10q26.2	ENSG00000148773	0.481331
201689_s_at	tumor protein D52	TPD52	chr8q21	ENSG00000076554	0.481121
221521_s_at	GINS complex subunit 2 (Psf2 homolog)	GINS2	chr16q24.1	ENSG00000131153	0.480924
1555908_at	family with sequence similarity 120A	FAM120A	chr9q22.31	ENSG00000048828	0.48082
210737_at	tubby homolog (mouse)	TUB	chr11p15.5	ENSG00000166402	0.480593
214710_s_at	cyclin B1	CCNB1	chr5q12	ENSG00000134057	0.480303
204641_at	NIMA (never in mitosis gene a)-related kinase 2	NEK2	chr1q32.2-q41	ENSG00000117650	0.479991
201250_s_at	solute carrier family 2 (facilitated glucose transporter), member 1	SLC2A1	chr1p34.2	ENSG00000117394	0.479887
201710_at	v-myb myeloblastosis viral oncogene homolog (avian)-like 2	MYBL2	chr20q13.1	ENSG00000101057	0.479854
209393_s_at	eukaryotic translation initiation factor 4E family member 2 /// uncharacterized LOC100507948	EIF4E2 /// LOC100507948	chr2q37.1	ENSG00000135930	0.479761
1554556_a_at	ATPase, class VI, type 11B	ATP11B	chr3q27	ENSG00000058063	0.479629
205046_at	centromere protein E, 312kDa	CENPE	chr4q24-q25	ENSG00000138778	0.479583
202763_at	caspase 3, apoptosis-related cysteine peptidase	CASP3	chr4q34	ENSG00000164305	0.47936
212949_at	non-SMC condensin I complex, subunit H	NCAPH	chr2q11.2	ENSG00000121152	0.479358
224468_s_at	chromosome 19 open reading frame 48	C19orf48	chr19q13.33	ENSG00000167747	0.479279
217962_at	NOP10 ribonucleoprotein homolog (yeast)	NOP10	chr15q14-q15	ENSG00000182117	0.478661
204492_at	Rho GTPase activating protein 11A	ARHGAP11A	chr15q13.2	ENSG00000198826	0.478079
216977_x_at	small nuclear ribonucleoprotein polypeptide A'	SNRPA1	chr15q26.3	ENSG00000131876	0.477654
210868_s_at	ELOVL fatty acid elongase 6	ELOVL6	chr4q25	ENSG00000170522	0.477543
211372_s_at	interleukin 1 receptor, type II	IL1R2	chr2q12	ENSG00000115590	0.477485
217755_at	hematological and neurological expressed 1	HN1	chr17q25.1	ENSG00000189159	0.477454
242944_at	family with sequence similarity 83, member A	FAM83A	chr8q24.13	ENSG00000147689	0.477285
210177_at	tripartite motif containing 15	TRIM15	chr6p21.3	ENSG00000137384 /// ENSG00000204610 /// ENSG00000224145 /// ENSG00000227147 /// ENSG00000233599 /// ENSG00000235259 /// ENSG00000235905 /// ENSG00000235960	0.477245
212020_s_at	antigen identified by monoclonal antibody Ki-67	MKI67	chr10q26.2	ENSG00000148773	0.477126
221777_at	chromosome 12 open reading frame 52	C12orf52	chr12q24.13	ENSG00000139405	0.476902
223368_s_at	N-terminal Xaa-Pro-Lys N-methyltransferase 1	NTMT1	chr9q34.11	ENSG00000148335	0.476893
208459_s_at	exportin 7	XPO7	chr8p21	ENSG00000130227	0.476537
219544_at	bora, aurora kinase A activator	BORA	chr13q22.1	ENSG00000136122	0.476529
200846_s_at	protein phosphatase 1, catalytic subunit, alpha isozyme	PPP1CA	chr11q13	ENSG00000172531	0.476517
228773_at	uncharacterized LOC100506100	LOC100506100	---	ENSG00000223478	0.476367
202094_at	baculoviral IAP repeat containing 5	BIRC5	chr17q25	ENSG00000089685	0.476339
201292_at	topoisomerase (DNA) II alpha 170kDa	TOP2A	chr17q21-q22	ENSG00000131747	0.47622
224679_at	mesoderm development candidate 2	MESDC2	chr15q13	ENSG00000117899	0.476061
204962_s_at	chromosome 2 open reading frame 18 /// centromere protein A	C2orf18 /// CENPA	chr2p23.3 /// chr2p24-p21	ENSG00000115163	0.476013
227570_at	transmembrane protein 86A	TMEM86A	chr11p15.1	ENSG00000151117	0.475905
236641_at	kinesin family member 14	KIF14	chr1q32.1	ENSG00000118193	0.475793
213098_at	RCD1 required for cell differentiation1 homolog (S. pombe)	RQCD1	chr2q35	ENSG00000144580	0.475754
219502_at	nei endonuclease VIII-like 3 (E. coli)	NEIL3	chr4q34.3	ENSG00000109674	0.475743
221520_s_at	cell division cycle associated 8	CDCA8	chr1p34.3	ENSG00000134690	0.475583
203111_s_at	PTK2B protein tyrosine kinase 2 beta	PTK2B	chr8p21.1	ENSG00000120899	0.474913
235704_at	DAZ associated protein 2	DAZAP2	chr12q12	---	0.474725
206604_at	ovo-like 1(Drosophila)	OVOL1	chr11q13	---	0.474672
223172_s_at	mitochondrial fission process 1	MTFP1	chr22q	ENSG00000242114 /// ENSG00000249590	0.474651
204654_s_at	transcription factor AP-2 alpha (activating enhancer binding protein 2 alpha)	TFAP2A	chr6p24	ENSG00000137203	0.474275
218663_at	non-SMC condensin I complex, subunit G	NCAPG	chr4p15.33	ENSG00000109805	0.474274
204026_s_at	ZW10 interactor	ZWINT	chr10q21-q22	ENSG00000122952	0.473829
201943_s_at	carboxypeptidase D	CPD	chr17q11.2	ENSG00000108582	0.473662
225208_s_at	family with sequence similarity 103, member A1	FAM103A1	chr15q25.2	ENSG00000169612	0.473586
225468_at	protein associated with topoisomerase II homolog 1 (yeast)	PATL1	chr11q12.1	ENSG00000166889	0.473221
204822_at	TTK protein kinase	TTK	chr6q13-q21	ENSG00000112742	0.473153
213007_at	Fanconi anemia, complementation group I	FANCI	chr15q26.1	ENSG00000140525	0.472842
202870_s_at	cell division cycle 20 homolog (S. cerevisiae)	CDC20	chr1p34.1	ENSG00000117399	0.472735
241640_at	B-cell receptor-associated protein 29	BCAP29	chr7q22-q31	ENSG00000075790	0.472185
235572_at	SPC24, NDC80 kinetochore complex component, homolog (S. cerevisiae)	SPC24	chr19p13.2	---	0.471904
201251_at	pyruvate kinase, muscle	PKM	chr15q22	ENSG00000067225	0.471568
209179_s_at	membrane bound O-acyltransferase domain containing 7	MBOAT7	chr19q13.4	ENSG00000125505 /// ENSG00000261902 /// ENSG00000261917 /// ENSG00000261944 /// ENSG00000262053 /// ENSG00000262126 /// ENSG00000262337 /// ENSG00000262479 /// ENSG00000262695	0.471363
218092_s_at	ArfGAP with FG repeats 1	AGFG1	chr2q36.3	ENSG00000173744	0.471186
203261_at	dynactin 6	DCTN6	chr8p12-p11	ENSG00000104671	0.471122
223907_s_at	PIN2/TERF1 interacting, telomerase inhibitor 1	PINX1	chr8p23	ENSG00000254093	0.470933
215942_s_at	G-2 and S-phase expressed 1	GTSE1	chr22q13.2-q13.3	ENSG00000075218	0.470827
204695_at	cell division cycle 25 homolog A (S. pombe)	CDC25A	chr3p21	ENSG00000164045	0.470738
218498_s_at	ERO1-like (S. cerevisiae)	ERO1L	chr14q22.1	ENSG00000197930	0.470509
202199_s_at	SRSF protein kinase 1	SRPK1	chr6p21.31	ENSG00000096063	0.470379
224535_s_at	mitochondrial ribosomal protein 63	MRP63	chr13q12.11	ENSG00000173141	0.470331
204875_s_at	GDP-mannose 4,6-dehydratase	GMDS	chr6p25	ENSG00000112699	0.470264
210186_s_at	FK506 binding protein 1A, 12kDa	FKBP1A	chr20p13	ENSG00000088832 /// ENSG00000198225	0.470245
228126_x_at	cortexin 1	CTXN1	chr19p13.2	ENSG00000178531	0.470127
202240_at	polo-like kinase 1	PLK1	chr16p12.2	ENSG00000166851	0.469982
222958_s_at	DEP domain containing 1	DEPDC1	chr1p31.2	ENSG00000024526	0.469945
217398_x_at	glyceraldehyde-3-phosphate dehydrogenase	GAPDH	chr12p13	ENSG00000111640	0.469752
214698_at	polypyrimidine tract binding protein 3	PTBP3	chr9q32	ENSG00000119314	0.469742
213344_s_at	H2A histone family, member X	H2AFX	chr11q23.3	---	0.46962
1564063_a_at	ATPase, class VI, type 11B	ATP11B	chr3q27	ENSG00000058063	0.469611
212581_x_at	glyceraldehyde-3-phosphate dehydrogenase	GAPDH	chr12p13	ENSG00000111640	0.469602
211080_s_at	NIMA (never in mitosis gene a)-related kinase 2	NEK2	chr1q32.2-q41	ENSG00000117650	0.469587
205393_s_at	checkpoint kinase 1	CHEK1	chr11q24.2	ENSG00000149554	0.469523
217324_at	---	---	---	---	0.469371
223229_at	ubiquitin-conjugating enzyme E2T (putative)	UBE2T	chr1q32.1	ENSG00000077152	0.469214
223996_s_at	mitochondrial ribosomal protein L30	MRPL30	chr2q11.2	ENSG00000185414 /// ENSG00000241962	0.46898
202338_at	thymidine kinase 1, soluble	TK1	chr17q23.2-q25.3	ENSG00000167900	0.468866
211519_s_at	kinesin family member 2C	KIF2C	chr1p34.1	ENSG00000142945	0.46879
223633_s_at	---	---	---	---	0.468676
228361_at	E2F transcription factor 2	E2F2	chr1p36	ENSG00000007968	0.468519
202580_x_at	forkhead box M1	FOXM1	chr12p13	ENSG00000111206	0.468486
1569793_at	solute carrier family 25 (glutamate carrier), member 18	SLC25A18	chr22q11.2	ENSG00000236754	0.468352
213226_at	cyclin A2	CCNA2	chr4q25-q31	ENSG00000145386	0.468126
215728_s_at	acyl-CoA thioesterase 7	ACOT7	chr1p36	ENSG00000097021	0.46791
210008_s_at	mitochondrial ribosomal protein S12	MRPS12	chr19q13.1-q13.2	ENSG00000128626	0.467901
204649_at	trophinin associated protein (tastin)	TROAP	chr12q13.12	ENSG00000135451	0.467869
38158_at	extra spindle pole bodies homolog 1 (S. cerevisiae)	ESPL1	chr12q	ENSG00000135476	0.467821
223880_x_at	chromosome 20 open reading frame 24 /// TGIF2-C20orf24 readthrough	C20orf24 /// TGIF2-C20ORF24	chr20q /// chr20q11.23	ENSG00000101084	0.467681
216251_s_at	tubulin tyrosine ligase-like family, member 12	TTLL12	chr22q13.31	ENSG00000100304	0.467663
224464_s_at	nudix (nucleoside diphosphate linked moiety X)-type motif 22	NUDT22	chr11q13.1	ENSG00000149761	0.467625
206364_at	kinesin family member 14	KIF14	chr1q32.1	ENSG00000118193	0.467363
202856_s_at	solute carrier family 16, member 3 (monocarboxylic acid transporter 4)	SLC16A3	chr17q25	ENSG00000141526	0.467315
222930_s_at	agmatine ureohydrolase (agmatinase)	AGMAT	chr1p36.21	ENSG00000116771	0.467304
209587_at	paired-like homeodomain 1	PITX1	chr5q31.1	---	0.467234
238075_at	checkpoint kinase 1	CHEK1	chr11q24.2	ENSG00000149554	0.467198
223570_at	minichromosome maintenance complex component 10	MCM10	chr10p13	ENSG00000065328	0.467125
222821_s_at	gem (nuclear organelle) associated protein 7	GEMIN7	chr19q13.32	ENSG00000142252	0.466783
218349_s_at	Zwilch, kinetochore associated, homolog (Drosophila)	ZWILCH	chr15q22.31	ENSG00000174442	0.466722
220153_at	ectonucleoside triphosphate diphosphohydrolase 7	ENTPD7	---	ENSG00000198018	0.46666
203663_s_at	cytochrome c oxidase subunit Va	COX5A	chr15q24.1	ENSG00000178741	0.466612
201577_at	NME/NM23 nucleoside diphosphate kinase 1	NME1	chr17q21.3	ENSG00000239672	0.466372
1553984_s_at	deoxythymidylate kinase (thymidylate kinase)	DTYMK	chr2q37.3	ENSG00000168393	0.46633
209714_s_at	cyclin-dependent kinase inhibitor 3	CDKN3	chr14q22	ENSG00000100526	0.465945
204767_s_at	flap structure-specific endonuclease 1	FEN1	chr11q12	ENSG00000168496	0.465831
208300_at	protein tyrosine phosphatase, receptor type, H	PTPRH	chr19q13.4	ENSG00000080031	0.465794
1568877_a_at	acyl-CoA binding domain containing 5	ACBD5	chr10p12.1	ENSG00000107897	0.465608
214426_x_at	chromatin assembly factor 1, subunit A (p150)	CHAF1A	chr19p13.3	ENSG00000167670	0.465587
204886_at	polo-like kinase 4	PLK4	chr4q28	ENSG00000142731	0.465514
220060_s_at	PARP1 binding protein	PARPBP	chr12q23.2	ENSG00000185480	0.465162
222077_s_at	Rac GTPase activating protein 1	RACGAP1	chr12q13.12	ENSG00000161800	0.465076
1557564_at	uncharacterized LOC100507300	LOC100507300	---	ENSG00000244926	0.465034
223417_at	RAD18 homolog (S. cerevisiae)	RAD18	chr3p25-p24	ENSG00000070950	0.464904
219787_s_at	epithelial cell transforming sequence 2 oncogene	ECT2	chr3q26.1-q26.2	ENSG00000114346	0.464635
225736_at	F-box protein 22	FBXO22	chr15q24.2	ENSG00000167196	0.464251
219306_at	kinesin family member 15	KIF15	chr3p21.31	ENSG00000163808	0.463869
204817_at	extra spindle pole bodies homolog 1 (S. cerevisiae)	ESPL1	chr12q	ENSG00000135476	0.463555
203433_at	5,10-methenyltetrahydrofolate synthetase (5-formyltetrahydrofolate cyclo-ligase) /// ST20-MTHFS readthrough	MTHFS /// ST20-MTHFS	chr15q25.1	ENSG00000136371 /// ENSG00000259332	0.463537
204126_s_at	cell division cycle 45 homolog (S. cerevisiae)	CDC45	chr22q11.21	ENSG00000093009	0.463475
217835_x_at	chromosome 20 open reading frame 24 /// TGIF2-C20orf24 readthrough	C20orf24 /// TGIF2-C20ORF24	chr20q /// chr20q11.23	ENSG00000101084	0.463295
48531_at	TNFAIP3 interacting protein 2	TNIP2	chr4p16.3	ENSG00000168884	0.462788
213453_x_at	glyceraldehyde-3-phosphate dehydrogenase	GAPDH	chr12p13	ENSG00000111640	0.4626
226355_at	POC1 centriolar protein homolog A (Chlamydomonas)	POC1A	chr3p21.2	ENSG00000164087	0.462531
201457_x_at	budding uninhibited by benzimidazoles 3 homolog (yeast)	BUB3	chr10q26	ENSG00000154473	0.462391
217791_s_at	aldehyde dehydrogenase 18 family, member A1	ALDH18A1	chr10q24.3	ENSG00000059573	0.462347
225466_at	protein associated with topoisomerase II homolog 1 (yeast)	PATL1	chr11q12.1	ENSG00000166889	0.462307
220934_s_at	transmembrane protein 223	TMEM223	chr11q12.3	ENSG00000168569	0.462201
205235_s_at	kinesin family member 20B	KIF20B	chr10q23.31	ENSG00000138182	0.462155
210357_s_at	spermine oxidase	SMOX	chr20p13	ENSG00000088826	0.462143
209891_at	SPC25, NDC80 kinetochore complex component, homolog (S. cerevisiae)	SPC25	chr2q31.1	ENSG00000152253 /// ENSG00000262452	0.462118
201297_s_at	MOB kinase activator 1A	MOB1A	chr2p13.1	ENSG00000114978	0.462071
208101_s_at	ubiquitin related modifier 1	URM1	chr9q34.11	ENSG00000167118	0.461804
209464_at	aurora kinase B	AURKB	chr17p13.1	ENSG00000178999	0.461681
211681_s_at	PDZ and LIM domain 5	PDLIM5	chr4q22	ENSG00000163110	0.461667
235545_at	DEP domain containing 1	DEPDC1	chr1p31.2	ENSG00000024526	0.461317
218059_at	zinc finger protein 706	ZNF706	chr8q22.3	ENSG00000120963	0.461128
1555758_a_at	cyclin-dependent kinase inhibitor 3	CDKN3	chr14q22	ENSG00000100526	0.461121
205895_s_at	nucleolar and coiled-body phosphoprotein 1	NOLC1	chr10q24.32	ENSG00000166197	0.461087
223484_at	chromosome 15 open reading frame 48	C15orf48	chr15q21.1	ENSG00000166920	0.461063
242781_at	family with sequence similarity 199, X-linked	FAM199X	chrXq22.2	ENSG00000123575	0.460976
208511_at	pituitary tumor-transforming 3, pseudogene	PTTG3P	chr8q13.1	ENSG00000213005	0.460967
217390_x_at	---	---	---	---	0.460757
203554_x_at	pituitary tumor-transforming 1	PTTG1	chr5q35.1	ENSG00000164611	0.460696
205167_s_at	cell division cycle 25 homolog C (S. pombe)	CDC25C	chr5q31	ENSG00000158402	0.46039
207828_s_at	centromere protein F, 350/400kDa (mitosin)	CENPF	chr1q32-q41	ENSG00000117724	0.46033
209408_at	kinesin family member 2C	KIF2C	chr1p34.1	ENSG00000142945	0.460055
208502_s_at	paired-like homeodomain 1	PITX1	chr5q31.1	ENSG00000069011	0.459886
210559_s_at	cyclin-dependent kinase 1	CDK1	chr10q21.1	ENSG00000170312	0.45976
209753_s_at	thymopoietin	TMPO	chr12q22	ENSG00000120802	0.459715
219763_at	DENN/MADD domain containing 1A	DENND1A	chr9q33.3	ENSG00000119522	0.459568
202535_at	Fas (TNFRSF6)-associated via death domain	FADD	chr11q13.3	ENSG00000168040	0.459441
212142_at	minichromosome maintenance complex component 4	MCM4	chr8q11.2	ENSG00000104738	0.459176
234992_x_at	epithelial cell transforming sequence 2 oncogene	ECT2	chr3q26.1-q26.2	ENSG00000114346	0.459111
218741_at	centromere protein M	CENPM	chr22q13.2	ENSG00000100162	0.459105
209853_s_at	proteasome (prosome, macropain) activator subunit 3 (PA28 gamma; Ki)	PSME3	chr17q21	ENSG00000131467	0.458775
209622_at	serine/threonine kinase 16	STK16	chr2q35	ENSG00000115661	0.458494
218290_at	pleckstrin homology domain containing, family J member 1	PLEKHJ1	chr19p13.3	ENSG00000104886	0.458485
204267_x_at	protein kinase, membrane associated tyrosine/threonine 1	PKMYT1	chr16p13.3	ENSG00000127564	0.458431
212866_at	R3H domain and coiled-coil containing 1	R3HCC1	chr8p21.3	ENSG00000104679	0.458378
1554408_a_at	thymidine kinase 1, soluble	TK1	chr17q23.2-q25.3	ENSG00000167900	0.458334
218202_x_at	mitochondrial ribosomal protein L44	MRPL44	chr2q36.1	ENSG00000135900	0.4581
203022_at	ribonuclease H2, subunit A	RNASEH2A	chr19p13.2	ENSG00000104889	0.4581
229751_s_at	pseudouridylate synthase 7 homolog (S. cerevisiae)-like	PUS7L	chr12q12	ENSG00000129317	0.457953
209832_s_at	chromatin licensing and DNA replication factor 1	CDT1	chr16q24.3	ENSG00000167513	0.457878
219662_at	chromosome 2 open reading frame 49	C2orf49	chr2q12.1	ENSG00000135974	0.457726
222491_at	heparan-alpha-glucosaminide N-acetyltransferase	HGSNAT	chr8p11.1	ENSG00000165102	0.457639
213571_s_at	eukaryotic translation initiation factor 4E family member 2 /// uncharacterized LOC100507948	EIF4E2 /// LOC100507948	chr2q37.1	ENSG00000135930	0.45752
200777_s_at	basic leucine zipper and W2 domains 1	BZW1	chr2q33	ENSG00000082153	0.45737
201940_at	carboxypeptidase D	CPD	chr17q11.2	ENSG00000108582	0.457236
1557444_at	triggering receptor expressed on myeloid cells-like 3, pseudogene	TREML3P	chr6p21.1	ENSG00000184106	0.457122
221025_x_at	pseudouridylate synthase 7 homolog (S. cerevisiae)-like	PUS7L	chr12q12	ENSG00000129317	0.456938
200776_s_at	basic leucine zipper and W2 domains 1	BZW1	chr2q33	ENSG00000082153	0.456837
208854_s_at	serine/threonine kinase 24	STK24	chr13q31.2-q32.3	ENSG00000102572	0.456779
208188_at	keratin 9	KRT9	chr17q21.1-q21.2	ENSG00000171403	0.456745
209642_at	budding uninhibited by benzimidazoles 1 homolog (yeast)	BUB1	chr2q14	ENSG00000169679	0.456727
222039_at	kinesin family member 18B	KIF18B	chr17q21.31	---	0.456542
223381_at	NUF2, NDC80 kinetochore complex component, homolog (S. cerevisiae)	NUF2	chr1q23.3	ENSG00000143228	0.456532
235177_at	methyltransferase like 21A	METTL21A	chr2q33.3	ENSG00000144401	0.456379
204459_at	cleavage stimulation factor, 3' pre-RNA, subunit 2, 64kDa	CSTF2	chrXq22.1	ENSG00000101811	0.456316
216624_s_at	myeloid/lymphoid or mixed-lineage leukemia (trithorax homolog, Drosophila)	MLL	chr11q23	ENSG00000118058	0.456091
228053_s_at	translocase of outer mitochondrial membrane 5 homolog (yeast)	TOMM5	chr9p13.2	ENSG00000175768	0.456005
214517_at	keratin associated protein 5-9	KRTAP5-9	chr11q13.5	ENSG00000254997	0.455827
203664_s_at	polymerase (RNA) II (DNA directed) polypeptide D	POLR2D	chr2q21	ENSG00000144231 /// ENSG00000244563	0.455652
224314_s_at	egl nine homolog 1 (C. elegans)	EGLN1	chr1q42.1	ENSG00000135766	0.455575
215449_at	translocator protein 2	TSPO2	chr6p21.1	ENSG00000112212	0.455443
209873_s_at	plakophilin 3	PKP3	chr11p15	ENSG00000184363	0.455355
203214_x_at	cyclin-dependent kinase 1	CDK1	chr10q21.1	ENSG00000170312	0.455276
229418_at	family with sequence similarity 222, member B	FAM222B	chr17q11.2	ENSG00000173065	0.455231
1555751_a_at	gem (nuclear organelle) associated protein 7	GEMIN7	chr19q13.32	ENSG00000142252	0.455211
218485_s_at	solute carrier family 35, member C1	SLC35C1	chr11p11.2	ENSG00000181830	0.455042
221258_s_at	kinesin family member 18A	KIF18A	chr11p14.1	ENSG00000121621	0.45503
