# Supplementary material for: Silencing of LOC389641 impairs cell proliferation and induces autophagy via EGFR/MET signaling in lung adenocarcinoma
Source: Aging (Albany NY). 2020 Dec 9;13(2):2539–52. doi: 10.18632/aging.202286 (PMC7880380; doi:10.18632/aging.202286)
Supplement: Supplementary Table 2 [file aging-13-202286-s002.xlsx]

## Sheet: GO from DAVID
Supplementary Table 2. Analysis of biological processes with DAVID using these 348 genes.
Category	Term	Term	-log10(p value)	Count	%	PValue	Genes	List Total	Pop Hits	Pop Total	Fold Enrichment	Bonferroni	Benjamini	FDR
GOTERM_BP_ALL	GO:0000279~M phase	M phase	44.434	58	21.6418	3.68095e-45	203362_S_AT, 204444_AT, 204641_AT, 212949_AT, 203755_AT, 221258_S_AT, 203764_AT, 219544_AT, 213226_AT, 213344_S_AT, 227165_AT, 223307_AT, 202094_AT, 205393_S_AT, 202095_S_AT, 218349_S_AT, 221520_S_AT, 201457_X_AT, 213599_AT, 238075_AT, 202240_AT, 205167_S_AT, 218039_AT, 207828_S_AT, 210559_S_AT, 226661_AT, 219650_AT, 203967_AT, 223381_AT, 224753_AT, 202705_AT, 202954_AT, 203968_S_AT, 204817_AT, 2…	211	329	14116	11.794	5.18647e-42	5.18647e-42	6.06974e-42
GOTERM_BP_ALL	GO:0000280~nuclear division	nuclear division	43.5347	50	18.6567	2.91962e-44	203362_S_AT, 204444_AT, 204641_AT, 212949_AT, 203755_AT, 221258_S_AT, 203764_AT, 219544_AT, 213226_AT, 227165_AT, 223307_AT, 202094_AT, 202095_S_AT, 218349_S_AT, 221520_S_AT, 201457_X_AT, 213599_AT, 202240_AT, 205167_S_AT, 218039_AT, 207828_S_AT, 210559_S_AT, 226661_AT, 219650_AT, 203967_AT, 223381_AT, 224753_AT, 202705_AT, 202954_AT, 203968_S_AT, 211080_S_AT, 204817_AT, 219918_S_AT, 205235_S_AT,…	211	220	14116	15.2047	4.11375e-41	2.05687e-41	4.81433e-41
GOTERM_BP_ALL	GO:0007067~mitosis	mitosis	43.5347	50	18.6567	2.91962e-44	203362_S_AT, 204444_AT, 204641_AT, 212949_AT, 203755_AT, 221258_S_AT, 203764_AT, 219544_AT, 213226_AT, 227165_AT, 223307_AT, 202094_AT, 202095_S_AT, 218349_S_AT, 221520_S_AT, 201457_X_AT, 213599_AT, 202240_AT, 205167_S_AT, 218039_AT, 207828_S_AT, 210559_S_AT, 226661_AT, 219650_AT, 203967_AT, 223381_AT, 224753_AT, 202705_AT, 202954_AT, 203968_S_AT, 211080_S_AT, 204817_AT, 219918_S_AT, 205235_S_AT,…	211	220	14116	15.2047	4.11375e-41	2.05687e-41	4.81433e-41
GOTERM_BP_ALL	GO:0000087~M phase of mitotic cell cycle	M phase of mitotic cell cycle	43.1228	50	18.6567	7.53731e-44	203362_S_AT, 204444_AT, 204641_AT, 212949_AT, 203755_AT, 221258_S_AT, 203764_AT, 219544_AT, 213226_AT, 227165_AT, 223307_AT, 202094_AT, 202095_S_AT, 218349_S_AT, 221520_S_AT, 201457_X_AT, 213599_AT, 202240_AT, 205167_S_AT, 218039_AT, 207828_S_AT, 210559_S_AT, 226661_AT, 219650_AT, 203967_AT, 223381_AT, 224753_AT, 202705_AT, 202954_AT, 203968_S_AT, 211080_S_AT, 204817_AT, 219918_S_AT, 205235_S_AT,…	211	224	14116	14.9331	1.06201e-40	3.54002e-41	1.24287e-40
GOTERM_BP_ALL	GO:0048285~organelle fission	organelle fission	42.62	50	18.6567	2.39859e-43	203362_S_AT, 204444_AT, 204641_AT, 212949_AT, 203755_AT, 221258_S_AT, 203764_AT, 219544_AT, 213226_AT, 227165_AT, 223307_AT, 202094_AT, 202095_S_AT, 218349_S_AT, 221520_S_AT, 201457_X_AT, 213599_AT, 202240_AT, 205167_S_AT, 218039_AT, 207828_S_AT, 210559_S_AT, 226661_AT, 219650_AT, 203967_AT, 223381_AT, 224753_AT, 202705_AT, 202954_AT, 203968_S_AT, 211080_S_AT, 204817_AT, 219918_S_AT, 205235_S_AT,…	211	229	14116	14.6071	3.37961e-40	8.44902e-41	3.95516e-40
GOTERM_BP_ALL	GO:0022403~cell cycle phase	cell cycle phase	42.184	61	22.7612	6.54631e-43	203362_S_AT, 204444_AT, 204641_AT, 212949_AT, 203755_AT, 221258_S_AT, 219544_AT, 203764_AT, 213226_AT, 213344_S_AT, 227165_AT, 223307_AT, 215942_S_AT, 202094_AT, 205393_S_AT, 202095_S_AT, 218349_S_AT, 221520_S_AT, 201457_X_AT, 213599_AT, 238075_AT, 202240_AT, 205167_S_AT, 218039_AT, 207828_S_AT, 210559_S_AT, 226661_AT, 219650_AT, 203967_AT, 209714_S_AT, 223381_AT, 224753_AT, 202705_AT, 202954_AT,…	211	414	14116	9.85732	9.22375e-40	1.84475e-40	1.07946e-39
GOTERM_BP_ALL	GO:0000278~mitotic cell cycle	mitotic cell cycle	41.4635	58	21.6418	3.43982e-42	203362_S_AT, 204444_AT, 204641_AT, 212949_AT, 203755_AT, 204962_S_AT, 221258_S_AT, 203764_AT, 219544_AT, 213226_AT, 227165_AT, 223307_AT, 215942_S_AT, 202094_AT, 205393_S_AT, 202095_S_AT, 218349_S_AT, 221520_S_AT, 201457_X_AT, 213599_AT, 238075_AT, 202240_AT, 205167_S_AT, 218039_AT, 207828_S_AT, 210559_S_AT, 226661_AT, 219650_AT, 203967_AT, 209714_S_AT, 223381_AT, 224753_AT, 202705_AT, 202954_AT,…	211	370	14116	10.4871	4.84671e-39	8.07785e-40	5.67212e-39
GOTERM_BP_ALL	GO:0007049~cell cycle	cell cycle	40.8259	76	28.3582	1.49329e-41	204641_AT, 212949_AT, 203755_AT, 219544_AT, 203764_AT, 213007_AT, 213344_S_AT, 227165_AT, 223307_AT, 202094_AT, 202095_S_AT, 221520_S_AT, 202240_AT, 207828_S_AT, 210559_S_AT, 209714_S_AT, 228361_AT, 202705_AT, 200846_S_AT, 202954_AT, 209832_S_AT, 203968_S_AT, 211080_S_AT, 212021_S_AT, 204817_AT, 204822_AT, 213008_AT, 205235_S_AT, 218542_AT, 219978_S_AT, 212020_S_AT, 219148_AT, 209464_AT, 205733_A…	211	776	14116	6.55211	2.10405e-38	3.00578e-39	2.46237e-38
GOTERM_BP_ALL	GO:0022402~cell cycle process	cell cycle process	38.4625	65	24.2537	3.44739e-39	203362_S_AT, 204444_AT, 204641_AT, 212949_AT, 203755_AT, 204962_S_AT, 221258_S_AT, 219544_AT, 203764_AT, 213226_AT, 213344_S_AT, 227165_AT, 223307_AT, 215942_S_AT, 202094_AT, 205393_S_AT, 202095_S_AT, 218349_S_AT, 221520_S_AT, 201457_X_AT, 213599_AT, 238075_AT, 202240_AT, 205167_S_AT, 218039_AT, 207828_S_AT, 210559_S_AT, 226661_AT, 219650_AT, 203967_AT, 209714_S_AT, 223381_AT, 224753_AT, 202705_A…	211	565	14116	7.69651	4.85738e-36	6.07172e-37	5.6846e-36
GOTERM_BP_ALL	GO:0051301~cell division	cell division	29.8578	44	16.4179	1.38754e-30	203362_S_AT, 204444_AT, 204641_AT, 212949_AT, 203755_AT, 219472_AT, 219544_AT, 213226_AT, 227165_AT, 223307_AT, 202094_AT, 202095_S_AT, 218349_S_AT, 221520_S_AT, 213599_AT, 202240_AT, 205167_S_AT, 218039_AT, 207828_S_AT, 210559_S_AT, 226661_AT, 203967_AT, 219650_AT, 223381_AT, 224753_AT, 202705_AT, 200846_S_AT, 202954_AT, 203968_S_AT, 204817_AT, 211080_S_AT, 219918_S_AT, 205235_S_AT, 218662_S_AT,…	211	295	14116	9.97838	1.95504e-27	2.17227e-28	2.28799e-27
GOTERM_BP_ALL	GO:0006996~organelle organization	organelle organization	22.1344	72	26.8657	7.33805e-23	218355_AT, 203362_S_AT, 200853_AT, 204444_AT, 204641_AT, 214426_X_AT, 212949_AT, 203755_AT, 204962_S_AT, 228053_S_AT, 213911_S_AT, 221258_S_AT, 219544_AT, 203764_AT, 213226_AT, 213344_S_AT, 227165_AT, 223307_AT, 218726_AT, 202094_AT, 202095_S_AT, 218349_S_AT, 221520_S_AT, 216624_S_AT, 201457_X_AT, 213599_AT, 202240_AT, 205167_S_AT, 218039_AT, 201489_AT, 207828_S_AT, 210559_S_AT, 226661_AT, 219650…	211	1332	14116	3.61624	1.03393e-19	1.03393e-20	1.21001e-19
GOTERM_BP_ALL	GO:0007059~chromosome segregation	chromosome segregation	21.467	23	8.58209	3.41177e-22	201457_X_AT, 203362_S_AT, 218663_AT, 204641_AT, 204817_AT, 211080_S_AT, 218039_AT, 207828_S_AT, 1554768_A_AT, 223907_S_AT, 218662_S_AT, 212949_AT, 221258_S_AT, 219472_AT, 203764_AT, 203554_X_AT, 219978_S_AT, 227165_AT, 201292_AT, 223381_AT, 202199_S_AT, 209891_AT, 205046_AT, 218726_AT, 202094_AT, 204026_S_AT, 224753_AT, 202095_S_AT, 38158_AT	211	81	14116	18.9964	4.80718e-19	4.37017e-20	5.62586e-19
GOTERM_BP_ALL	GO:0051726~regulation of cell cycle	regulation of cell cycle	16.6734	33	12.3134	2.12146e-17	203362_S_AT, 202954_AT, 204641_AT, 209832_S_AT, 203968_S_AT, 211080_S_AT, 204817_AT, 204822_AT, 205235_S_AT, 203755_AT, 203764_AT, 213226_AT, 213344_S_AT, 219978_S_AT, 202094_AT, 215942_S_AT, 205393_S_AT, 205733_AT, 203418_AT, 202095_S_AT, 218349_S_AT, 204126_S_AT, 204886_AT, 201457_X_AT, 205394_AT, 1555758_A_AT, 238075_AT, 209642_AT, 205167_S_AT, 218039_AT, 207828_S_AT, 205436_S_AT, 1554768_A_AT…	211	331	14116	6.66984	2.98914e-14	2.49095e-15	3.4982e-14
GOTERM_BP_ALL	GO:0016043~cellular component organization	cellular component organization	16.5569	90	33.5821	2.77379e-17	204641_AT, 1555751_A_AT, 221336_AT, 212949_AT, 203755_AT, 219544_AT, 203764_AT, 213344_S_AT, 228323_AT, 227165_AT, 223307_AT, 202094_AT, 202095_S_AT, 221520_S_AT, 201890_AT, 236906_X_AT, 202240_AT, 201489_AT, 207828_S_AT, 217324_AT, 210559_S_AT, 219787_S_AT, 1552680_A_AT, 202763_AT, 228361_AT, 203931_S_AT, 202705_AT, 202535_AT, 202954_AT, 218357_S_AT, 203968_S_AT, 211080_S_AT, 204817_AT, 204822_A…	211	2498	14116	2.41035	3.90828e-14	3.00637e-15	4.57387e-14
GOTERM_BP_ALL	GO:0007346~regulation of mitotic cell cycle	regulation of mitotic cell cycle	15.1981	23	8.58209	6.33777e-16	202954_AT, 203362_S_AT, 204641_AT, 209832_S_AT, 203968_S_AT, 211080_S_AT, 204817_AT, 204822_AT, 205235_S_AT, 203755_AT, 203764_AT, 213226_AT, 219978_S_AT, 215942_S_AT, 202094_AT, 203418_AT, 202095_S_AT, 218349_S_AT, 201457_X_AT, 209642_AT, 205167_S_AT, 218039_AT, 207828_S_AT, 1554768_A_AT, 203214_X_AT, 210559_S_AT, 203967_AT, 204267_X_AT, 205046_AT, 204026_S_AT, 228868_X_AT, 38158_AT	211	152	14116	10.1231	9.38583e-13	6.70575e-14	1.09912e-12
GOTERM_BP_ALL	GO:0000075~cell cycle checkpoint	cell cycle checkpoint	14.9338	19	7.08955	1.16472e-15	203362_S_AT, 209832_S_AT, 203968_S_AT, 204822_AT, 203755_AT, 213226_AT, 213344_S_AT, 202094_AT, 215942_S_AT, 205393_S_AT, 205733_AT, 203418_AT, 202095_S_AT, 218349_S_AT, 204126_S_AT, 201457_X_AT, 205394_AT, 238075_AT, 209642_AT, 207828_S_AT, 205436_S_AT, 1554768_A_AT, 203214_X_AT, 210559_S_AT, 203967_AT, 205046_AT, 204026_S_AT, 228868_X_AT	211	91	14116	13.9682	1.5643e-12	1.0425e-13	1.83187e-12
GOTERM_BP_ALL	GO:0000070~mitotic sister chromatid segregation	mitotic sister chromatid segregation	13.1051	13	4.85075	7.85067e-14	201457_X_AT, 203362_S_AT, 218663_AT, 204641_AT, 218039_AT, 211080_S_AT, 204817_AT, 1554768_A_AT, 223907_S_AT, 218662_S_AT, 212949_AT, 221258_S_AT, 203764_AT, 219978_S_AT, 205046_AT, 204026_S_AT, 224753_AT, 38158_AT	211	36	14116	24.1585	1.10596e-10	6.91225e-12	1.2943e-10
GOTERM_BP_ALL	GO:0000819~sister chromatid segregation	sister chromatid segregation	12.9409	13	4.85075	1.14587e-13	201457_X_AT, 203362_S_AT, 218663_AT, 204641_AT, 218039_AT, 211080_S_AT, 204817_AT, 1554768_A_AT, 223907_S_AT, 218662_S_AT, 212949_AT, 221258_S_AT, 203764_AT, 219978_S_AT, 205046_AT, 204026_S_AT, 224753_AT, 38158_AT	211	37	14116	23.5056	1.61436e-10	9.49629e-12	1.88927e-10
GOTERM_BP_ALL	GO:0010564~regulation of cell cycle process	regulation of cell cycle process	10.9355	17	6.34328	1.16012e-11	204886_AT, 203362_S_AT, 202954_AT, 204641_AT, 209832_S_AT, 205167_S_AT, 209642_AT, 204817_AT, 211080_S_AT, 218039_AT, 207828_S_AT, 204822_AT, 1554768_A_AT, 205235_S_AT, 204887_S_AT, 203764_AT, 219978_S_AT, 204267_X_AT, 205046_AT, 215942_S_AT, 202094_AT, 202095_S_AT, 228868_X_AT, 38158_AT	211	114	14116	9.97639	1.6346e-08	9.08113e-10	1.91298e-08
GOTERM_BP_ALL	GO:0007093~mitotic cell cycle checkpoint	mitotic cell cycle checkpoint	10.6374	12	4.47761	2.30454e-11	218349_S_AT, 201457_X_AT, 203362_S_AT, 209642_AT, 204822_AT, 207828_S_AT, 1554768_A_AT, 203214_X_AT, 210559_S_AT, 203755_AT, 213226_AT, 205046_AT, 215942_S_AT, 204026_S_AT, 203418_AT	211	43	14116	18.6699	3.24709e-08	1.70899e-09	3.80008e-08
GOTERM_BP_ALL	GO:0006260~DNA replication	DNA replication	10.2394	20	7.46269	5.76272e-11	212141_AT, 209832_S_AT, 212142_AT, 223570_AT, 214426_X_AT, 203968_S_AT, 1554408_A_AT, 202996_AT, 222036_S_AT, 223907_S_AT, 222037_AT, 201292_AT, 205393_S_AT, 205733_AT, 204126_S_AT, 221521_S_AT, 209773_S_AT, 205394_AT, 201890_AT, 238075_AT, 220651_S_AT, 205167_S_AT, 202338_AT, 207828_S_AT, 205024_S_AT, 204768_S_AT, 203022_AT, 203967_AT, 204695_AT, 204767_S_AT, 228868_X_AT	211	190	14116	7.04216	8.11968e-08	4.05984e-09	9.50248e-08
GOTERM_BP_ALL	GO:0006259~DNA metabolic process	GO:0006259~DNA metabolic process	10.0413	31	11.5672	9.09369e-11	212141_AT, 212142_AT, 209832_S_AT, 223570_AT, 214426_X_AT, 203968_S_AT, 1554408_A_AT, 213008_AT, 223417_AT, 222036_S_AT, 202996_AT, 223907_S_AT, 213007_AT, 213344_S_AT, 222037_AT, 201292_AT, 205393_S_AT, 205733_AT, 223785_AT, 204126_S_AT, 209773_S_AT, 221521_S_AT, 216624_S_AT, 205394_AT, 201890_AT, 238075_AT, 220651_S_AT, 205167_S_AT, 207828_S_AT, 205436_S_AT, 202338_AT, 205024_S_AT, 204768_S_AT,…	211	506	14116	4.09865	1.2813e-07	6.10143e-09	1.49951e-07
GOTERM_BP_ALL	GO:0007088~regulation of mitosis	GO:0007088~regulation of mitosis	9.29774	12	4.47761	5.03797e-10	203362_S_AT, 204641_AT, 205167_S_AT, 209642_AT, 211080_S_AT, 218039_AT, 204817_AT, 204822_AT, 207828_S_AT, 1554768_A_AT, 205235_S_AT, 203764_AT, 219978_S_AT, 204267_X_AT, 205046_AT, 38158_AT	211	56	14116	14.3358	7.0985e-07	3.22659e-08	8.30739e-07
GOTERM_BP_ALL	GO:0051783~regulation of nuclear division	GO:0051783~regulation of nuclear division	9.29774	12	4.47761	5.03797e-10	203362_S_AT, 204641_AT, 205167_S_AT, 209642_AT, 211080_S_AT, 218039_AT, 204817_AT, 204822_AT, 207828_S_AT, 1554768_A_AT, 205235_S_AT, 203764_AT, 219978_S_AT, 204267_X_AT, 205046_AT, 38158_AT	211	56	14116	14.3358	7.0985e-07	3.22659e-08	8.30739e-07
GOTERM_BP_ALL	GO:0009987~cellular process	GO:0009987~cellular process	8.30904	191	71.2687	4.90865e-09	225736_AT, 217791_S_AT, 209179_S_AT, 204856_AT, 204641_AT, 221336_AT, 1554408_A_AT, 1552344_S_AT, 222036_S_AT, 212949_AT, 216251_S_AT, 203433_AT, 203764_AT, 213007_AT, 213344_S_AT, 224535_S_AT, 228323_AT, 227165_AT, 223307_AT, 224483_S_AT, 234725_S_AT, 202094_AT, 213571_S_AT, 201688_S_AT, 202095_S_AT, 221520_S_AT, 201890_AT, 236906_X_AT, 220651_S_AT, 207828_S_AT, 217324_AT, 210008_S_AT, 204649_AT…	211	10541	14116	1.21222	6.91626e-06	3.00708e-07	8.09415e-06
GOTERM_BP_ALL	GO:0007017~microtubule-based process	GO:0007017~microtubule-based process	8.13125	20	7.46269	7.39184e-09	218355_AT, 202954_AT, 222039_AT, 204444_AT, 204641_AT, 211080_S_AT, 204817_AT, 204822_AT, 205235_S_AT, 204962_S_AT, 203755_AT, 221258_S_AT, 218009_S_AT, 219978_S_AT, 209891_AT, 215942_S_AT, 218039_AT, 236641_AT, 206364_AT, 219306_AT, 211519_S_AT, 205046_AT, 204026_S_AT, 209408_AT, 38158_AT	211	253	14116	5.28858	1.0415e-05	4.33962e-07	1.21888e-05
GOTERM_BP_ALL	GO:0050000~chromosome localization	GO:0050000~chromosome localization	7.34508	7	2.61194	4.51768e-08	221258_S_AT, 203764_AT, 205046_AT, 202094_AT, 207828_S_AT, 224753_AT, 202095_S_AT, 223907_S_AT	211	15	14116	31.2202	6.36521e-05	2.54616e-06	7.44945e-05
GOTERM_BP_ALL	GO:0051303~establishment of chromosome localization	GO:0051303~establishment of chromosome localization	7.34508	7	2.61194	4.51768e-08	221258_S_AT, 203764_AT, 205046_AT, 202094_AT, 207828_S_AT, 224753_AT, 202095_S_AT, 223907_S_AT	211	15	14116	31.2202	6.36521e-05	2.54616e-06	7.44945e-05
GOTERM_BP_ALL	GO:0051276~chromosome organization	GO:0051276~chromosome organization	7.20943	26	9.70149	6.17408e-08	203362_S_AT, 204641_AT, 200853_AT, 214426_X_AT, 211080_S_AT, 204817_AT, 223907_S_AT, 218662_S_AT, 212949_AT, 204962_S_AT, 221258_S_AT, 213911_S_AT, 203764_AT, 219978_S_AT, 213344_S_AT, 201292_AT, 218726_AT, 205733_AT, 221520_S_AT, 216624_S_AT, 201457_X_AT, 218663_AT, 218039_AT, 207828_S_AT, 205436_S_AT, 1554768_A_AT, 203554_X_AT, 208511_AT, 205046_AT, 204026_S_AT, 218115_AT, 224753_AT, 38158_AT	211	485	14116	3.58642	8.69891e-05	3.34587e-06	0.000101808
GOTERM_BP_ALL	GO:0031577~spindle checkpoint	GO:0031577~spindle checkpoint	6.29626	6	2.23881	5.05528e-07	203362_S_AT, 205046_AT, 202094_AT, 209642_AT, 207828_S_AT, 204822_AT, 1554768_A_AT, 202095_S_AT	211	12	14116	33.4502	0.000712035	2.63807e-05	0.00083359
GOTERM_BP_ALL	GO:0030071~regulation of mitotic metaphase/anaphase transition	GO:0030071~regulation of mitotic metaphase/anaphase transition	6.20949	7	2.61194	6.17319e-07	203764_AT, 203362_S_AT, 205046_AT, 209642_AT, 204817_AT, 207828_S_AT, 204822_AT, 1554768_A_AT, 38158_AT	211	22	14116	21.2865	0.000869425	3.10639e-05	0.00101793
GOTERM_BP_ALL	GO:0051656~establishment of organelle localization	GO:0051656~establishment of organelle localization	6.10401	10	3.73134	7.87021e-07	204962_S_AT, 221258_S_AT, 203764_AT, 219978_S_AT, 205046_AT, 202094_AT, 204817_AT, 218039_AT, 207828_S_AT, 224753_AT, 202095_S_AT, 223907_S_AT, 38158_AT	211	69	14116	9.69572	0.0011083	3.82377e-05	0.00129776
GOTERM_BP_ALL	GO:0031570~DNA integrity checkpoint	GO:0031570~DNA integrity checkpoint	6.04538	9	3.35821	9.0079e-07	210559_S_AT, 204126_S_AT, 213226_AT, 213344_S_AT, 205394_AT, 203967_AT, 238075_AT, 209832_S_AT, 215942_S_AT, 203968_S_AT, 205393_S_AT, 205733_AT, 205436_S_AT, 203418_AT, 228868_X_AT, 203214_X_AT	211	52	14116	11.5789	0.00126841	4.23062e-05	0.00148535
GOTERM_BP_ALL	GO:0051640~organelle localization	GO:0051640~organelle localization	5.97112	11	4.10448	1.06876e-06	239002_AT, 218039_AT, 204817_AT, 219918_S_AT, 207828_S_AT, 223907_S_AT, 204962_S_AT, 221258_S_AT, 203764_AT, 219978_S_AT, 205046_AT, 202094_AT, 224753_AT, 202095_S_AT, 38158_AT	211	92	14116	7.99897	0.00150475	4.85758e-05	0.00176233
GOTERM_BP_ALL	GO:0000226~microtubule cytoskeleton organization	GO:0000226~microtubule cytoskeleton organization	5.70347	13	4.85075	1.97937e-06	202954_AT, 204444_AT, 204641_AT, 204817_AT, 218039_AT, 211080_S_AT, 204822_AT, 203755_AT, 204962_S_AT, 221258_S_AT, 218009_S_AT, 211519_S_AT, 219978_S_AT, 209891_AT, 204026_S_AT, 209408_AT, 38158_AT	211	147	14116	5.91637	0.00278504	8.71503e-05	0.00326384
GOTERM_BP_ALL	GO:0051329~interphase of mitotic cell cycle	GO:0051329~interphase of mitotic cell cycle	5.51802	11	4.10448	3.03372e-06	205394_AT, 1555758_A_AT, 238075_AT, 203968_S_AT, 205167_S_AT, 207828_S_AT, 203967_AT, 214710_S_AT, 209714_S_AT, 204695_AT, 202094_AT, 215942_S_AT, 205393_S_AT, 205733_AT, 224753_AT, 202095_S_AT	211	103	14116	7.14471	0.0042654	0.000129523	0.00500236
GOTERM_BP_ALL	GO:0006974~response to DNA damage stimulus	GO:0006974~response to DNA damage stimulus	5.5088	20	7.46269	3.09887e-06	211595_S_AT, 214426_X_AT, 213008_AT, 202996_AT, 223417_AT, 213007_AT, 213226_AT, 213344_S_AT, 201292_AT, 215942_S_AT, 205393_S_AT, 205733_AT, 203418_AT, 223785_AT, 205394_AT, 238075_AT, 205436_S_AT, 205024_S_AT, 203214_X_AT, 204768_S_AT, 210559_S_AT, 204603_AT, 203554_X_AT, 235588_AT, 202763_AT, 219502_AT, 204767_S_AT, 234465_AT, 235178_X_AT	211	373	14116	3.58716	0.0043568	0.000128413	0.00510978
GOTERM_BP_ALL	GO:0051325~interphase	GO:0051325~interphase	5.40443	11	4.10448	3.94065e-06	205394_AT, 1555758_A_AT, 238075_AT, 203968_S_AT, 205167_S_AT, 207828_S_AT, 203967_AT, 214710_S_AT, 209714_S_AT, 204695_AT, 202094_AT, 215942_S_AT, 205393_S_AT, 205733_AT, 224753_AT, 202095_S_AT	211	106	14116	6.9425	0.005537	0.000158627	0.00649776
GOTERM_BP_ALL	GO:0007051~spindle organization	GO:0007051~spindle organization	5.38734	8	2.98507	4.09881e-06	203755_AT, 218009_S_AT, 202954_AT, 204444_AT, 209891_AT, 204026_S_AT, 204817_AT, 204822_AT, 38158_AT	211	45	14116	11.8934	0.00575859	0.00016041	0.00675854
GOTERM_BP_ALL	GO:0033043~regulation of organelle organization	GO:0033043~regulation of organelle organization	5.34156	15	5.59701	4.55451e-06	204886_AT, 216624_S_AT, 203362_S_AT, 204641_AT, 205167_S_AT, 209642_AT, 204817_AT, 218039_AT, 211080_S_AT, 207828_S_AT, 204822_AT, 205235_S_AT, 1554768_A_AT, 204887_S_AT, 203764_AT, 219978_S_AT, 227165_AT, 204267_X_AT, 205046_AT, 38158_AT	211	217	14116	4.62446	0.00639677	0.000173426	0.00750992
GOTERM_BP_ALL	GO:0006323~DNA packaging	GO:0006323~DNA packaging	5.01886	11	4.10448	9.57492e-06	218663_AT, 200853_AT, 214426_X_AT, 218039_AT, 205436_S_AT, 218662_S_AT, 212949_AT, 204962_S_AT, 213911_S_AT, 219978_S_AT, 213344_S_AT, 201292_AT, 218726_AT, 218115_AT, 224753_AT	211	117	14116	6.28979	0.0134005	0.000354967	0.0157875
GOTERM_BP_ALL	GO:0051439~regulation of ubiquitin-protein ligase activity during mitotic cell cycle	GO:0051439~regulation of ubiquitin-protein ligase activity during mitotic cell cycle	5.00008	9	3.35821	9.99805e-06	210559_S_AT, 203755_AT, 203362_S_AT, 201457_X_AT, 202870_S_AT, 202954_AT, 209853_S_AT, 214710_S_AT, 202240_AT, 1554768_A_AT, 203214_X_AT	211	71	14116	8.48034	0.0139886	0.000361148	0.0164851
GOTERM_BP_ALL	GO:0000079~regulation of cyclin-dependent protein kinase activity	GO:0000079~regulation of cyclin-dependent protein kinase activity	4.84519	8	2.98507	1.42827e-05	1555758_A_AT, 204267_X_AT, 205394_AT, 203967_AT, 209714_S_AT, 238075_AT, 202763_AT, 204695_AT, 205167_S_AT, 203968_S_AT, 205393_S_AT, 205733_AT	211	54	14116	9.91118	0.0199233	0.000502986	0.023549
GOTERM_BP_ALL	GO:0045841~negative regulation of mitotic metaphase/anaphase transition	GO:0045841~negative regulation of mitotic metaphase/anaphase transition	4.83941	5	1.86567	1.4474e-05	203362_S_AT, 205046_AT, 209642_AT, 207828_S_AT, 204822_AT, 1554768_A_AT	211	11	14116	30.4093	0.0201874	0.00049729	0.0238643
GOTERM_BP_ALL	GO:0051310~metaphase plate congression	GO:0051310~metaphase plate congression	4.83941	5	1.86567	1.4474e-05	221258_S_AT, 205046_AT, 207828_S_AT, 224753_AT, 223907_S_AT	211	11	14116	30.4093	0.0201874	0.00049729	0.0238643
GOTERM_BP_ALL	GO:0007094~mitotic cell cycle spindle assembly checkpoint	GO:0007094~mitotic cell cycle spindle assembly checkpoint	4.83941	5	1.86567	1.4474e-05	203362_S_AT, 205046_AT, 209642_AT, 207828_S_AT, 204822_AT, 1554768_A_AT	211	11	14116	30.4093	0.0201874	0.00049729	0.0238643
GOTERM_BP_ALL	GO:0031396~regulation of protein ubiquitination	GO:0031396~regulation of protein ubiquitination	4.75085	10	3.73134	1.7748e-05	210559_S_AT, 203755_AT, 203362_S_AT, 201457_X_AT, 202870_S_AT, 202954_AT, 209853_S_AT, 210186_S_AT, 214710_S_AT, 202240_AT, 1554768_A_AT, 203214_X_AT	211	100	14116	6.69005	0.0246971	0.000595233	0.0292617
GOTERM_BP_ALL	GO:0051438~regulation of ubiquitin-protein ligase activity	GO:0051438~regulation of ubiquitin-protein ligase activity	4.69556	9	3.35821	2.01577e-05	210559_S_AT, 203755_AT, 203362_S_AT, 201457_X_AT, 202870_S_AT, 202954_AT, 209853_S_AT, 214710_S_AT, 202240_AT, 1554768_A_AT, 203214_X_AT	211	78	14116	7.71929	0.0280029	0.000660304	0.0332339
GOTERM_BP_ALL	GO:0051784~negative regulation of nuclear division	GO:0051784~negative regulation of nuclear division	4.66841	5	1.86567	2.14582e-05	203362_S_AT, 205046_AT, 209642_AT, 207828_S_AT, 204822_AT, 1554768_A_AT	211	12	14116	27.8752	0.0297824	0.000686921	0.0353777
GOTERM_BP_ALL	GO:0045839~negative regulation of mitosis	GO:0045839~negative regulation of mitosis	4.66841	5	1.86567	2.14582e-05	203362_S_AT, 205046_AT, 209642_AT, 207828_S_AT, 204822_AT, 1554768_A_AT	211	12	14116	27.8752	0.0297824	0.000686921	0.0353777
GOTERM_BP_ALL	GO:0051340~regulation of ligase activity	GO:0051340~regulation of ligase activity	4.57483	9	3.35821	2.66179e-05	210559_S_AT, 203755_AT, 203362_S_AT, 201457_X_AT, 202870_S_AT, 202954_AT, 209853_S_AT, 214710_S_AT, 202240_AT, 1554768_A_AT, 203214_X_AT	211	81	14116	7.43339	0.0368105	0.000833098	0.0438826
GOTERM_BP_ALL	GO:0010948~negative regulation of cell cycle process	GO:0010948~negative regulation of cell cycle process	4.53814	6	2.23881	2.8964e-05	203362_S_AT, 205046_AT, 209642_AT, 204817_AT, 207828_S_AT, 204822_AT, 1554768_A_AT, 38158_AT	211	25	14116	16.0561	0.0399893	0.000886798	0.0477496
GOTERM_BP_ALL	GO:0000910~cytokinesis	GO:0000910~cytokinesis	4.5318	7	2.61194	2.93902e-05	218009_S_AT, 219978_S_AT, 202240_AT, 209464_AT, 202094_AT, 204817_AT, 218039_AT, 202095_S_AT, 222077_S_AT, 38158_AT	211	41	14116	11.422	0.0405656	0.000880705	0.0484521
GOTERM_BP_ALL	GO:0044260~cellular macromolecule metabolic process	GO:0044260~cellular macromolecule metabolic process	4.42204	107	39.9254	3.78404e-05	225736_AT, 212141_AT, 204015_S_AT, 1555751_A_AT, 204856_AT, 204641_AT, 223570_AT, 1554408_A_AT, 221336_AT, 1552344_S_AT, 222036_S_AT, 216251_S_AT, 203755_AT, 213007_AT, 213344_S_AT, 224535_S_AT, 223307_AT, 202199_S_AT, 213571_S_AT, 221521_S_AT, 226175_AT, 201890_AT, 202240_AT, 220651_S_AT, 201489_AT, 207828_S_AT, 217324_AT, 209587_AT, 210559_S_AT, 218202_X_AT, 210008_S_AT, 219162_S_AT, 202763_AT,…	211	5214	14116	1.37291	0.0519217	0.00111018	0.062379
GOTERM_BP_ALL	GO:0031145~anaphase-promoting complex-dependent proteasomal ubiquitin-dependent protein catabolic process	GO:0031145~anaphase-promoting complex-dependent proteasomal ubiquitin-dependent protein catabolic process	4.31072	8	2.98507	4.88966e-05	210559_S_AT, 203755_AT, 203362_S_AT, 201457_X_AT, 202870_S_AT, 202954_AT, 209853_S_AT, 214710_S_AT, 1554768_A_AT, 203214_X_AT	211	65	14116	8.2339	0.0665771	0.00140507	0.0805978
GOTERM_BP_ALL	GO:0006281~DNA repair	GO:0006281~DNA repair	4.04038	15	5.59701	9.11213e-05	205394_AT, 238075_AT, 214426_X_AT, 205436_S_AT, 213008_AT, 202996_AT, 223417_AT, 205024_S_AT, 204768_S_AT, 204603_AT, 203554_X_AT, 213007_AT, 213344_S_AT, 201292_AT, 235588_AT, 219502_AT, 204767_S_AT, 205393_S_AT, 205733_AT, 234465_AT, 223785_AT, 235178_X_AT	211	284	14116	3.53348	0.120495	0.00256462	0.150149
GOTERM_BP_ALL	GO:0051327~M phase of meiotic cell cycle	GO:0051327~M phase of meiotic cell cycle	3.97898	9	3.35821	0.000104959	205394_AT, 206604_AT, 238075_AT, 202240_AT, 204641_AT, 212021_S_AT, 211080_S_AT, 204817_AT, 205436_S_AT, 205024_S_AT, 212023_S_AT, 204603_AT, 213344_S_AT, 212020_S_AT, 205393_S_AT, 212022_S_AT, 38158_AT	211	98	14116	6.14392	0.137478	0.0028957	0.172932
GOTERM_BP_ALL	GO:0007126~meiosis	GO:0007126~meiosis	3.97898	9	3.35821	0.000104959	205394_AT, 206604_AT, 238075_AT, 202240_AT, 204641_AT, 212021_S_AT, 211080_S_AT, 204817_AT, 205436_S_AT, 205024_S_AT, 212023_S_AT, 204603_AT, 213344_S_AT, 212020_S_AT, 205393_S_AT, 212022_S_AT, 38158_AT	211	98	14116	6.14392	0.137478	0.0028957	0.172932
GOTERM_BP_ALL	GO:0051321~meiotic cell cycle	GO:0051321~meiotic cell cycle	3.91718	9	3.35821	0.000121009	205394_AT, 206604_AT, 238075_AT, 202240_AT, 204641_AT, 212021_S_AT, 211080_S_AT, 204817_AT, 205436_S_AT, 205024_S_AT, 212023_S_AT, 204603_AT, 213344_S_AT, 212020_S_AT, 205393_S_AT, 212022_S_AT, 38158_AT	211	100	14116	6.02104	0.156767	0.00327371	0.199352
GOTERM_BP_ALL	GO:0043933~macromolecular complex subunit organization	GO:0043933~macromolecular complex subunit organization	3.83151	25	9.32836	0.000147398	212166_AT, 202535_AT, 1555751_A_AT, 200853_AT, 214426_X_AT, 222821_S_AT, 204962_S_AT, 221258_S_AT, 213911_S_AT, 202680_AT, 213344_S_AT, 210186_S_AT, 218726_AT, 205733_AT, 203664_S_AT, 209773_S_AT, 203111_S_AT, 216624_S_AT, 201890_AT, 236906_X_AT, 207828_S_AT, 205436_S_AT, 205024_S_AT, 205644_S_AT, 209622_AT, 208459_S_AT, 211519_S_AT, 205046_AT, 228361_AT, 218115_AT, 209408_AT	211	710	14116	2.35565	0.187548	0.00391117	0.242775
GOTERM_BP_ALL	GO:0044237~cellular metabolic process	GO:0044237~cellular metabolic process	3.78389	126	47.0149	0.000164478	225736_AT, 217791_S_AT, 212141_AT, 209179_S_AT, 222930_S_AT, 213453_X_AT, 204875_S_AT, 204015_S_AT, 204641_AT, 204856_AT, 1555751_A_AT, 223570_AT, 1554408_A_AT, 221336_AT, 1552344_S_AT, 222036_S_AT, 216251_S_AT, 203755_AT, 203433_AT, 213007_AT, 213344_S_AT, 224535_S_AT, 223307_AT, 201251_AT, 202199_S_AT, 213571_S_AT, 221521_S_AT, 226175_AT, 201890_AT, 202240_AT, 220651_S_AT, 201489_AT, 207828_S_A…	211	6636	14116	1.27026	0.20687	0.0042828	0.270871
GOTERM_BP_ALL	GO:0007080~mitotic metaphase plate congression	GO:0007080~mitotic metaphase plate congression	3.59311	4	1.49254	0.000255207	221258_S_AT, 205046_AT, 224753_AT, 223907_S_AT	211	9	14116	29.7335	0.302067	0.00651743	0.419994
GOTERM_BP_ALL	GO:0007018~microtubule-based movement	GO:0007018~microtubule-based movement	3.54935	9	3.35821	0.000282262	218355_AT, 206364_AT, 221258_S_AT, 211519_S_AT, 219306_AT, 222039_AT, 204444_AT, 205046_AT, 209408_AT, 205235_S_AT, 236641_AT	211	113	14116	5.32836	0.328179	0.00707774	0.464421
GOTERM_BP_ALL	GO:0034621~cellular macromolecular complex subunit organization	GO:0034621~cellular macromolecular complex subunit organization	3.52703	16	5.97015	0.000297145	212166_AT, 203111_S_AT, 236906_X_AT, 200853_AT, 1555751_A_AT, 214426_X_AT, 207828_S_AT, 205436_S_AT, 222821_S_AT, 204962_S_AT, 221258_S_AT, 213911_S_AT, 205644_S_AT, 208459_S_AT, 211519_S_AT, 213344_S_AT, 210186_S_AT, 205046_AT, 218726_AT, 218115_AT, 209408_AT	211	357	14116	2.99834	0.342125	0.00731939	0.488854
GOTERM_BP_ALL	GO:0033554~cellular response to stress	GO:0033554~cellular response to stress	3.51561	21	7.83582	0.000305066	211595_S_AT, 214426_X_AT, 213008_AT, 202996_AT, 223417_AT, 213007_AT, 213226_AT, 213344_S_AT, 201292_AT, 215942_S_AT, 205393_S_AT, 205733_AT, 203418_AT, 218498_S_AT, 223785_AT, 205394_AT, 238075_AT, 205436_S_AT, 205024_S_AT, 203214_X_AT, 204768_S_AT, 210559_S_AT, 204603_AT, 203554_X_AT, 235588_AT, 202763_AT, 219502_AT, 204767_S_AT, 234465_AT, 235178_X_AT	211	566	14116	2.48217	0.349428	0.00738472	0.501853
GOTERM_BP_ALL	GO:0065003~macromolecular complex assembly	GO:0065003~macromolecular complex assembly	3.42128	23	8.58209	0.000379073	212166_AT, 202535_AT, 1555751_A_AT, 200853_AT, 214426_X_AT, 222821_S_AT, 204962_S_AT, 213911_S_AT, 202680_AT, 213344_S_AT, 210186_S_AT, 218726_AT, 205733_AT, 203664_S_AT, 203111_S_AT, 209773_S_AT, 216624_S_AT, 201890_AT, 236906_X_AT, 207828_S_AT, 205436_S_AT, 205024_S_AT, 209622_AT, 205644_S_AT, 208459_S_AT, 205046_AT, 228361_AT, 218115_AT	211	665	14116	2.31385	0.413871	0.00901362	0.623243
GOTERM_BP_ALL	GO:0065004~protein-DNA complex assembly	GO:0065004~protein-DNA complex assembly	3.38674	8	2.98507	0.000410451	204962_S_AT, 213911_S_AT, 213344_S_AT, 200853_AT, 218726_AT, 205046_AT, 214426_X_AT, 218115_AT, 207828_S_AT, 205436_S_AT	211	91	14116	5.88136	0.439229	0.0095944	0.674668
GOTERM_BP_ALL	GO:0030261~chromosome condensation	GO:0030261~chromosome condensation	3.32683	5	1.86567	0.000471164	219978_S_AT, 218663_AT, 201292_AT, 218039_AT, 224753_AT, 218662_S_AT, 212949_AT	211	25	14116	13.3801	0.485226	0.0108266	0.7741
GOTERM_BP_ALL	GO:0045842~positive regulation of mitotic metaphase/anaphase transition	GO:0045842~positive regulation of mitotic metaphase/anaphase transition	3.18419	3	1.1194	0.000654344	203764_AT, 205046_AT, 204817_AT, 38158_AT	211	3	14116	66.9005	0.602386	0.0147653	1.07353
GOTERM_BP_ALL	GO:0000077~DNA damage checkpoint	GO:0000077~DNA damage checkpoint	3.15041	6	2.23881	0.000707278	210559_S_AT, 213226_AT, 213344_S_AT, 205394_AT, 238075_AT, 215942_S_AT, 205393_S_AT, 205733_AT, 205436_S_AT, 203418_AT, 203214_X_AT	211	48	14116	8.36256	0.630981	0.0156994	1.1599
GOTERM_BP_ALL	GO:0016070~RNA metabolic process	GO:0016070~RNA metabolic process	3.13468	28	10.4478	0.000733359	217962_AT, 1555751_A_AT, 229751_S_AT, 221336_AT, 222821_S_AT, 202580_X_AT, 222555_S_AT, 203941_AT, 202680_AT, 202199_S_AT, 226416_AT, 223416_AT, 203664_S_AT, 205895_S_AT, 208101_S_AT, 214941_S_AT, 216624_S_AT, 216977_X_AT, 204459_AT, 214698_AT, 208361_S_AT, 204768_S_AT, 218202_X_AT, 205644_S_AT, 221025_X_AT, 203534_AT, 203554_X_AT, 218774_AT, 203022_AT, 204767_S_AT, 228361_AT, 203931_S_AT	211	938	14116	1.99703	0.644305	0.0160216	1.20243
GOTERM_BP_ALL	GO:0043170~macromolecule metabolic process	GO:0043170~macromolecule metabolic process	3.11294	109	40.6716	0.000771008	225736_AT, 212141_AT, 204015_S_AT, 204641_AT, 1555751_A_AT, 204856_AT, 223570_AT, 1554408_A_AT, 221336_AT, 1552344_S_AT, 222036_S_AT, 216251_S_AT, 203755_AT, 213007_AT, 213344_S_AT, 224535_S_AT, 223307_AT, 202199_S_AT, 213571_S_AT, 221521_S_AT, 226175_AT, 201890_AT, 202240_AT, 220651_S_AT, 201489_AT, 207828_S_AT, 217324_AT, 209587_AT, 210559_S_AT, 218202_X_AT, 210008_S_AT, 219162_S_AT, 202763_AT,…	211	5710	14116	1.27708	0.662696	0.0165805	1.2638
GOTERM_BP_ALL	GO:0043161~proteasomal ubiquitin-dependent protein catabolic process	GO:0043161~proteasomal ubiquitin-dependent protein catabolic process	3.08815	8	2.98507	0.000816308	210559_S_AT, 203755_AT, 203362_S_AT, 201457_X_AT, 202870_S_AT, 202954_AT, 209853_S_AT, 214710_S_AT, 1554768_A_AT, 203214_X_AT	211	102	14116	5.2471	0.683568	0.017283	1.33758
GOTERM_BP_ALL	GO:0010498~proteasomal protein catabolic process	GO:0010498~proteasomal protein catabolic process	3.08815	8	2.98507	0.000816308	210559_S_AT, 203755_AT, 203362_S_AT, 201457_X_AT, 202870_S_AT, 202954_AT, 209853_S_AT, 214710_S_AT, 1554768_A_AT, 203214_X_AT	211	102	14116	5.2471	0.683568	0.017283	1.33758
GOTERM_BP_ALL	GO:0008283~cell proliferation	GO:0008283~cell proliferation	3.0815	17	6.34328	0.000828899	203111_S_AT, 210052_S_AT, 201457_X_AT, 239002_AT, 202240_AT, 205167_S_AT, 209642_AT, 212021_S_AT, 207828_S_AT, 219918_S_AT, 203270_AT, 212023_S_AT, 1553984_S_AT, 203755_AT, 203764_AT, 219306_AT, 211519_S_AT, 212020_S_AT, 210186_S_AT, 204695_AT, 212022_S_AT, 209408_AT, 222077_S_AT	211	436	14116	2.6085	0.689137	0.0172877	1.35808
GOTERM_BP_ALL	GO:0007010~cytoskeleton organization	GO:0007010~cytoskeleton organization	3.0815	17	6.34328	0.000828899	203111_S_AT, 202954_AT, 208188_AT, 204444_AT, 204641_AT, 204817_AT, 218039_AT, 211080_S_AT, 204822_AT, 203755_AT, 204962_S_AT, 221258_S_AT, 218009_S_AT, 211519_S_AT, 219978_S_AT, 218092_S_AT, 209891_AT, 204026_S_AT, 209408_AT, 222077_S_AT, 38158_AT	211	436	14116	2.6085	0.689137	0.0172877	1.35808
GOTERM_BP_ALL	GO:0007076~mitotic chromosome condensation	GO:0007076~mitotic chromosome condensation	3.08014	4	1.49254	0.000831502	219978_S_AT, 218663_AT, 218039_AT, 224753_AT, 218662_S_AT, 212949_AT	211	13	14116	20.5848	0.690276	0.0170887	1.36232
GOTERM_BP_ALL	GO:0044238~primary metabolic process	GO:0044238~primary metabolic process	3.06929	127	47.3881	0.000852537	225736_AT, 217791_S_AT, 212141_AT, 209179_S_AT, 222930_S_AT, 213453_X_AT, 204875_S_AT, 204015_S_AT, 204641_AT, 204856_AT, 1555751_A_AT, 223570_AT, 1554408_A_AT, 221336_AT, 1552344_S_AT, 222036_S_AT, 210160_AT, 216251_S_AT, 203755_AT, 213007_AT, 213344_S_AT, 224535_S_AT, 223307_AT, 201251_AT, 202199_S_AT, 213571_S_AT, 221521_S_AT, 226175_AT, 201890_AT, 202240_AT, 220651_S_AT, 201489_AT, 207828_S_A…	211	6923	14116	1.22727	0.699329	0.0172657	1.39655
GOTERM_BP_ALL	GO:0044085~cellular component biogenesis	GO:0044085~cellular component biogenesis	3.0429	29	10.8209	0.000905938	212166_AT, 202535_AT, 217962_AT, 200853_AT, 1555751_A_AT, 214426_X_AT, 222821_S_AT, 204962_S_AT, 213911_S_AT, 202680_AT, 213344_S_AT, 228323_AT, 210186_S_AT, 218726_AT, 226416_AT, 205733_AT, 222077_S_AT, 203664_S_AT, 205895_S_AT, 209773_S_AT, 203111_S_AT, 216624_S_AT, 201890_AT, 236906_X_AT, 207828_S_AT, 205436_S_AT, 205024_S_AT, 205644_S_AT, 209622_AT, 208459_S_AT, 1552680_A_AT, 218092_S_AT, 205…	211	1001	14116	1.93818	0.72114	0.0180781	1.48342
GOTERM_BP_ALL	GO:0034622~cellular macromolecular complex assembly	GO:0034622~cellular macromolecular complex assembly	3.01279	14	5.22388	0.000970989	212166_AT, 203111_S_AT, 236906_X_AT, 1555751_A_AT, 200853_AT, 214426_X_AT, 207828_S_AT, 205436_S_AT, 222821_S_AT, 204962_S_AT, 205644_S_AT, 213911_S_AT, 208459_S_AT, 213344_S_AT, 210186_S_AT, 218726_AT, 205046_AT, 218115_AT	211	318	14116	2.9453	0.745585	0.0190941	1.58913
GOTERM_BP_ALL	GO:0007052~mitotic spindle organization	GO:0007052~mitotic spindle organization	2.88803	4	1.49254	0.00129411	218009_S_AT, 204444_AT, 209891_AT, 204822_AT	211	15	14116	17.8401	0.838715	0.025023	2.11268
GOTERM_BP_ALL	GO:0022607~cellular component assembly	GO:0022607~cellular component assembly	2.80773	26	9.70149	0.00155693	212166_AT, 202535_AT, 200853_AT, 1555751_A_AT, 214426_X_AT, 222821_S_AT, 204962_S_AT, 213911_S_AT, 202680_AT, 213344_S_AT, 228323_AT, 210186_S_AT, 218726_AT, 205733_AT, 222077_S_AT, 203664_S_AT, 209773_S_AT, 203111_S_AT, 216624_S_AT, 201890_AT, 236906_X_AT, 207828_S_AT, 205436_S_AT, 205024_S_AT, 205644_S_AT, 209622_AT, 208459_S_AT, 218092_S_AT, 1552680_A_AT, 205046_AT, 228361_AT, 218115_AT	211	887	14116	1.96101	0.888689	0.0296266	2.53659
GOTERM_BP_ALL	GO:0031398~positive regulation of protein ubiquitination	GO:0031398~positive regulation of protein ubiquitination	2.8056	7	2.61194	0.00156459	210559_S_AT, 202870_S_AT, 202954_AT, 209853_S_AT, 210186_S_AT, 214710_S_AT, 202240_AT, 203214_X_AT	211	84	14116	5.57504	0.889885	0.0293739	2.54891
GOTERM_BP_ALL	GO:0031399~regulation of protein modification process	GO:0031399~regulation of protein modification process	2.80441	13	4.85075	0.00156887	203111_S_AT, 216624_S_AT, 202954_AT, 202870_S_AT, 201457_X_AT, 203362_S_AT, 202240_AT, 204822_AT, 1554768_A_AT, 203214_X_AT, 203755_AT, 210559_S_AT, 209853_S_AT, 210186_S_AT, 214710_S_AT	211	295	14116	2.94816	0.890548	0.0290661	2.5558
GOTERM_BP_ALL	GO:0006261~DNA-dependent DNA replication	GO:0006261~DNA-dependent DNA replication	2.77503	6	2.23881	0.00167868	204126_S_AT, 212141_AT, 222037_AT, 212142_AT, 204767_S_AT, 205733_AT, 202996_AT, 222036_S_AT, 205024_S_AT, 204768_S_AT	211	58	14116	6.92074	0.906262	0.0306679	2.73237
GOTERM_BP_ALL	GO:0016311~dephosphorylation	GO:0016311~dephosphorylation	2.66853	9	3.35821	0.00214519	215227_X_AT, 200846_S_AT, 202313_AT, 1555758_A_AT, 209714_S_AT, 204015_S_AT, 200913_AT, 204695_AT, 205167_S_AT, 201629_S_AT, 208300_AT	211	154	14116	3.90977	0.951482	0.0385343	3.47916
GOTERM_BP_ALL	GO:0006139~nucleobase, nucleoside, nucleotide and nucleic acid metabolic process	GO:0006139~nucleobase, nucleoside, nucleotide and nucleic acid metabolic process	2.59985	70	26.1194	0.00251275	204654_S_AT, 212141_AT, 204875_S_AT, 1555751_A_AT, 212142_AT, 223570_AT, 214426_X_AT, 221336_AT, 1554408_A_AT, 203270_AT, 1552344_S_AT, 222036_S_AT, 222821_S_AT, 202580_X_AT, 213007_AT, 213344_S_AT, 202199_S_AT, 205393_S_AT, 203664_S_AT, 204126_S_AT, 209773_S_AT, 221521_S_AT, 216624_S_AT, 201890_AT, 238075_AT, 220651_S_AT, 205167_S_AT, 207828_S_AT, 208361_S_AT, 1553984_S_AT, 209587_AT, 218202_X_A…	211	3409	14116	1.37373	0.971129	0.0444304	4.06376
GOTERM_BP_ALL	GO:0051436~negative regulation of ubiquitin-protein ligase activity during mitotic cell cycle	GO:0051436~negative regulation of ubiquitin-protein ligase activity during mitotic cell cycle	2.55549	6	2.23881	0.00278297	203755_AT, 203362_S_AT, 201457_X_AT, 202870_S_AT, 202954_AT, 209853_S_AT, 1554768_A_AT	211	65	14116	6.17543	0.980291	0.0484896	4.49141
GOTERM_BP_ALL	GO:0051983~regulation of chromosome segregation	GO:0051983~regulation of chromosome segregation	2.49806	3	1.1194	0.00317646	211519_S_AT, 205046_AT, 204817_AT, 209408_AT, 38158_AT	211	6	14116	33.4502	0.988698	0.0544934	5.11094
GOTERM_BP_ALL	GO:0034508~centromere complex assembly	GO:0034508~centromere complex assembly	2.49806	3	1.1194	0.00317646	218726_AT, 205046_AT, 207828_S_AT	211	6	14116	33.4502	0.988698	0.0544934	5.11094
GOTERM_BP_ALL	GO:0051444~negative regulation of ubiquitin-protein ligase activity	GO:0051444~negative regulation of ubiquitin-protein ligase activity	2.49797	6	2.23881	0.00317711	203755_AT, 203362_S_AT, 201457_X_AT, 202870_S_AT, 202954_AT, 209853_S_AT, 1554768_A_AT	211	67	14116	5.99109	0.988708	0.0538498	5.11196
GOTERM_BP_ALL	GO:0051352~negative regulation of ligase activity	GO:0051352~negative regulation of ligase activity	2.49797	6	2.23881	0.00317711	203755_AT, 203362_S_AT, 201457_X_AT, 202870_S_AT, 202954_AT, 209853_S_AT, 1554768_A_AT	211	67	14116	5.99109	0.988708	0.0538498	5.11196
GOTERM_BP_ALL	GO:0051437~positive regulation of ubiquitin-protein ligase activity during mitotic cell cycle	GO:0051437~positive regulation of ubiquitin-protein ligase activity during mitotic cell cycle	2.46998	6	2.23881	0.00338857	210559_S_AT, 202870_S_AT, 202954_AT, 209853_S_AT, 214710_S_AT, 202240_AT, 203214_X_AT	211	68	14116	5.90298	0.991626	0.0566561	5.44333
GOTERM_BP_ALL	GO:0051128~regulation of cellular component organization	GO:0051128~regulation of cellular component organization	2.44418	16	5.97015	0.00359603	204886_AT, 216624_S_AT, 203362_S_AT, 204641_AT, 205167_S_AT, 209642_AT, 204817_AT, 218039_AT, 211080_S_AT, 207828_S_AT, 204822_AT, 205235_S_AT, 1554768_A_AT, 204887_S_AT, 203764_AT, 219978_S_AT, 227165_AT, 204267_X_AT, 221539_AT, 205046_AT, 38158_AT	211	458	14116	2.33713	0.993755	0.0593235	5.76739
GOTERM_BP_ALL	GO:0006470~protein amino acid dephosphorylation	GO:0006470~protein amino acid dephosphorylation	2.42709	8	2.98507	0.00374032	215227_X_AT, 200846_S_AT, 202313_AT, 204015_S_AT, 200913_AT, 204695_AT, 205167_S_AT, 201629_S_AT, 208300_AT	211	133	14116	4.02409	0.994908	0.0609223	5.99215
GOTERM_BP_ALL	GO:0050790~regulation of catalytic activity	GO:0050790~regulation of catalytic activity	2.42447	24	8.95522	0.00376295	1552648_A_AT, 202954_AT, 203362_S_AT, 203968_S_AT, 223907_S_AT, 203755_AT, 210186_S_AT, 202094_AT, 205393_S_AT, 205733_AT, 202095_S_AT, 231775_AT, 203111_S_AT, 201457_X_AT, 202870_S_AT, 205394_AT, 1555758_A_AT, 238075_AT, 202240_AT, 205167_S_AT, 1554768_A_AT, 203214_X_AT, 210559_S_AT, 241371_AT, 209853_S_AT, 204267_X_AT, 203967_AT, 218092_S_AT, 209714_S_AT, 214710_S_AT, 202763_AT, 205046_AT, 2046…	211	846	14116	1.89789	0.995068	0.0605814	6.02736
GOTERM_BP_ALL	GO:0051443~positive regulation of ubiquitin-protein ligase activity	GO:0051443~positive regulation of ubiquitin-protein ligase activity	2.41549	6	2.23881	0.00384156	210559_S_AT, 202870_S_AT, 202954_AT, 209853_S_AT, 214710_S_AT, 202240_AT, 203214_X_AT	211	70	14116	5.73433	0.995587	0.061113	6.14954
GOTERM_BP_ALL	GO:0000085~G2 phase of mitotic cell cycle	GO:0000085~G2 phase of mitotic cell cycle	2.3562	3	1.1194	0.00440356	215942_S_AT, 205733_AT, 207828_S_AT	211	7	14116	28.6716	0.998007	0.0689804	7.01883
GOTERM_BP_ALL	GO:0032297~negative regulation of DNA replication initiation	GO:0032297~negative regulation of DNA replication initiation	2.3562	3	1.1194	0.00440356	204126_S_AT, 203967_AT, 209832_S_AT, 203968_S_AT, 228868_X_AT	211	7	14116	28.6716	0.998007	0.0689804	7.01883
GOTERM_BP_ALL	GO:0051319~G2 phase	GO:0051319~G2 phase	2.3562	3	1.1194	0.00440356	215942_S_AT, 205733_AT, 207828_S_AT	211	7	14116	28.6716	0.998007	0.0689804	7.01883
GOTERM_BP_ALL	GO:0000076~DNA replication checkpoint	GO:0000076~DNA replication checkpoint	2.3562	3	1.1194	0.00440356	204126_S_AT, 203967_AT, 209832_S_AT, 203968_S_AT, 228868_X_AT	211	7	14116	28.6716	0.998007	0.0689804	7.01883
GOTERM_BP_ALL	GO:0034641~cellular nitrogen compound metabolic process	GO:0034641~cellular nitrogen compound metabolic process	2.35012	73	27.2388	0.00446557	217791_S_AT, 222930_S_AT, 212141_AT, 204875_S_AT, 1555751_A_AT, 223570_AT, 1554408_A_AT, 221336_AT, 1552344_S_AT, 222036_S_AT, 213007_AT, 213344_S_AT, 202199_S_AT, 221521_S_AT, 201890_AT, 220651_S_AT, 207828_S_AT, 209587_AT, 218202_X_AT, 202763_AT, 219502_AT, 228361_AT, 203931_S_AT, 217962_AT, 209832_S_AT, 203968_S_AT, 1554556_A_AT, 213008_AT, 202996_AT, 203941_AT, 205733_AT, 223785_AT, 231599_X_…	211	3670	14116	1.33072	0.998175	0.0691526	7.11427
GOTERM_BP_ALL	GO:0051351~positive regulation of ligase activity	GO:0051351~positive regulation of ligase activity	2.33724	6	2.23881	0.00460006	210559_S_AT, 202870_S_AT, 202954_AT, 209853_S_AT, 214710_S_AT, 202240_AT, 203214_X_AT	211	73	14116	5.49867	0.998491	0.0703933	7.32097
GOTERM_BP_ALL	GO:0031397~negative regulation of protein ubiquitination	GO:0031397~negative regulation of protein ubiquitination	2.31203	6	2.23881	0.00487498	203755_AT, 203362_S_AT, 201457_X_AT, 202870_S_AT, 202954_AT, 209853_S_AT, 1554768_A_AT	211	74	14116	5.42436	0.998978	0.0736538	7.74216
GOTERM_BP_ALL	GO:0065009~regulation of molecular function	GO:0065009~regulation of molecular function	2.30194	26	9.70149	0.00498959	1552648_A_AT, 203362_S_AT, 202954_AT, 203968_S_AT, 223907_S_AT, 203755_AT, 201577_AT, 210186_S_AT, 202094_AT, 205393_S_AT, 205733_AT, 202095_S_AT, 231775_AT, 203111_S_AT, 201457_X_AT, 202870_S_AT, 205394_AT, 1555758_A_AT, 238075_AT, 202240_AT, 205167_S_AT, 1554768_A_AT, 224314_S_AT, 203214_X_AT, 210559_S_AT, 241371_AT, 209853_S_AT, 203967_AT, 204267_X_AT, 209714_S_AT, 214710_S_AT, 218092_S_AT, 20…	211	969	14116	1.79506	0.999131	0.0745265	7.91721
GOTERM_BP_ALL	GO:0040001~establishment of mitotic spindle localization	GO:0040001~establishment of mitotic spindle localization	2.23552	3	1.1194	0.00581407	204962_S_AT, 219978_S_AT, 204817_AT, 218039_AT, 38158_AT	211	8	14116	25.0877	0.99973	0.0854322	9.16735
GOTERM_BP_ALL	GO:0051785~positive regulation of nuclear division	GO:0051785~positive regulation of nuclear division	2.23179	4	1.49254	0.00586418	203764_AT, 219978_S_AT, 205046_AT, 204817_AT, 218039_AT, 38158_AT	211	25	14116	10.7041	0.999748	0.0852523	9.2428
GOTERM_BP_ALL	GO:0045840~positive regulation of mitosis	GO:0045840~positive regulation of mitosis	2.23179	4	1.49254	0.00586418	203764_AT, 219978_S_AT, 205046_AT, 204817_AT, 218039_AT, 38158_AT	211	25	14116	10.7041	0.999748	0.0852523	9.2428
GOTERM_BP_ALL	GO:0006807~nitrogen compound metabolic process	GO:0006807~nitrogen compound metabolic process	2.21086	74	27.6119	0.00615375	217791_S_AT, 222930_S_AT, 212141_AT, 204875_S_AT, 1555751_A_AT, 223570_AT, 1554408_A_AT, 221336_AT, 1552344_S_AT, 222036_S_AT, 213007_AT, 213344_S_AT, 202199_S_AT, 221521_S_AT, 201890_AT, 220651_S_AT, 207828_S_AT, 209587_AT, 218202_X_AT, 202763_AT, 219502_AT, 228361_AT, 203931_S_AT, 217962_AT, 209832_S_AT, 203968_S_AT, 1554556_A_AT, 213008_AT, 202996_AT, 203941_AT, 205733_AT, 223785_AT, 231599_X_…	211	3778	14116	1.31039	0.999833	0.0883743	9.67774
GOTERM_BP_ALL	GO:0008152~metabolic process	GO:0008152~metabolic process	2.19463	133	49.6269	0.00638813	225736_AT, 217791_S_AT, 212141_AT, 209179_S_AT, 222930_S_AT, 213453_X_AT, 204875_S_AT, 204015_S_AT, 204641_AT, 204856_AT, 1555751_A_AT, 223570_AT, 1554408_A_AT, 221336_AT, 1552344_S_AT, 222036_S_AT, 210160_AT, 216251_S_AT, 203755_AT, 203433_AT, 213007_AT, 213344_S_AT, 224535_S_AT, 223307_AT, 201251_AT, 202199_S_AT, 213571_S_AT, 221521_S_AT, 226175_AT, 201890_AT, 202240_AT, 220651_S_AT, 201489_AT,…	211	7647	14116	1.16356	0.99988	0.0906724	10.0283
GOTERM_BP_ALL	GO:0042770~DNA damage response, signal transduction	GO:0042770~DNA damage response, signal transduction	2.16915	6	2.23881	0.00677406	210559_S_AT, 213226_AT, 213344_S_AT, 205394_AT, 238075_AT, 215942_S_AT, 205393_S_AT, 205733_AT, 205436_S_AT, 203418_AT, 203214_X_AT	211	80	14116	5.01754	0.999931	0.094947	10.6029
GOTERM_BP_ALL	GO:0045786~negative regulation of cell cycle	GO:0045786~negative regulation of cell cycle	2.14664	6	2.23881	0.00713446	203362_S_AT, 202763_AT, 205046_AT, 209642_AT, 207828_S_AT, 204822_AT, 1554768_A_AT	211	81	14116	4.95559	0.999958	0.0987792	11.1362
GOTERM_BP_ALL	GO:0030174~regulation of DNA replication initiation	GO:0030174~regulation of DNA replication initiation	2.13063	3	1.1194	0.00740232	204126_S_AT, 203967_AT, 209832_S_AT, 203968_S_AT, 228868_X_AT	211	9	14116	22.3002	0.999972	0.101315	11.5307
GOTERM_BP_ALL	GO:0033205~cytokinesis during cell cycle	GO:0033205~cytokinesis during cell cycle	2.13063	3	1.1194	0.00740232	219978_S_AT, 202240_AT, 218039_AT, 222077_S_AT	211	9	14116	22.3002	0.999972	0.101315	11.5307
GOTERM_BP_ALL	GO:0010639~negative regulation of organelle organization	GO:0010639~negative regulation of organelle organization	2.12447	6	2.23881	0.00750805	203362_S_AT, 205046_AT, 209642_AT, 204817_AT, 207828_S_AT, 204822_AT, 1554768_A_AT, 38158_AT	211	82	14116	4.89516	0.999976	0.101708	11.686
GOTERM_BP_ALL	GO:0006396~RNA processing	GO:0006396~RNA processing	2.10953	17	6.34328	0.00777092	208101_S_AT, 214941_S_AT, 217962_AT, 216977_X_AT, 1555751_A_AT, 204459_AT, 229751_S_AT, 214698_AT, 222821_S_AT, 218202_X_AT, 222555_S_AT, 203941_AT, 221025_X_AT, 205644_S_AT, 203534_AT, 202199_S_AT, 226416_AT, 223416_AT, 203664_S_AT, 205895_S_AT	211	547	14116	2.07917	0.999983	0.104094	12.0709
GOTERM_BP_ALL	GO:0008156~negative regulation of DNA replication	GO:0008156~negative regulation of DNA replication	2.09235	4	1.49254	0.00808439	204126_S_AT, 203967_AT, 209832_S_AT, 203968_S_AT, 205733_AT, 228868_X_AT	211	28	14116	9.55721	0.999989	0.107063	12.5279
GOTERM_BP_ALL	GO:0006334~nucleosome assembly	GO:0006334~nucleosome assembly	2.08115	6	2.23881	0.00829572	204962_S_AT, 213911_S_AT, 213344_S_AT, 200853_AT, 218726_AT, 214426_X_AT, 218115_AT, 205436_S_AT	211	84	14116	4.77861	0.999992	0.108699	12.8347
GOTERM_BP_ALL	GO:0006461~protein complex assembly	GO:0006461~protein complex assembly	2.06725	16	5.97015	0.00856543	212166_AT, 203111_S_AT, 209773_S_AT, 216624_S_AT, 202535_AT, 201890_AT, 236906_X_AT, 214426_X_AT, 207828_S_AT, 205024_S_AT, 209622_AT, 202680_AT, 208459_S_AT, 210186_S_AT, 205046_AT, 228361_AT, 205733_AT, 203664_S_AT	211	505	14116	2.11962	0.999995	0.111016	13.2247
GOTERM_BP_ALL	GO:0070271~protein complex biogenesis	GO:0070271~protein complex biogenesis	2.06725	16	5.97015	0.00856543	212166_AT, 203111_S_AT, 209773_S_AT, 216624_S_AT, 202535_AT, 201890_AT, 236906_X_AT, 214426_X_AT, 207828_S_AT, 205024_S_AT, 209622_AT, 202680_AT, 208459_S_AT, 210186_S_AT, 205046_AT, 228361_AT, 205733_AT, 203664_S_AT	211	505	14116	2.11962	0.999995	0.111016	13.2247
GOTERM_BP_ALL	GO:0031400~negative regulation of protein modification process	GO:0031400~negative regulation of protein modification process	2.05959	7	2.61194	0.00871786	203755_AT, 203362_S_AT, 201457_X_AT, 202870_S_AT, 202954_AT, 209853_S_AT, 210186_S_AT, 1554768_A_AT	211	119	14116	3.93532	0.999996	0.111862	13.4445
GOTERM_BP_ALL	GO:0051293~establishment of spindle localization	GO:0051293~establishment of spindle localization	2.03797	3	1.1194	0.00916275	204962_S_AT, 219978_S_AT, 204817_AT, 218039_AT, 38158_AT	211	10	14116	20.0701	0.999998	0.116198	14.0828
GOTERM_BP_ALL	GO:0051653~spindle localization	GO:0051653~spindle localization	2.03797	3	1.1194	0.00916275	204962_S_AT, 219978_S_AT, 204817_AT, 218039_AT, 38158_AT	211	10	14116	20.0701	0.999998	0.116198	14.0828
GOTERM_BP_ALL	GO:0031497~chromatin assembly	GO:0031497~chromatin assembly	2.01855	6	2.23881	0.00958194	204962_S_AT, 213911_S_AT, 213344_S_AT, 200853_AT, 218726_AT, 214426_X_AT, 218115_AT, 205436_S_AT	211	87	14116	4.61383	0.999999	0.12013	14.6802
GOTERM_BP_ALL	GO:0012501~programmed cell death	GO:0012501~programmed cell death	2.00562	18	6.71642	0.00987133	1552648_A_AT, 203111_S_AT, 241640_AT, 216624_S_AT, 202535_AT, 212322_AT, 204817_AT, 221336_AT, 203755_AT, 241371_AT, 219787_S_AT, 223172_S_AT, 209853_S_AT, 201292_AT, 202763_AT, 234992_X_AT, 201251_AT, 202094_AT, 228361_AT, 208300_AT, 202095_S_AT, 231775_AT, 38158_AT	211	611	14116	1.97088	0.999999	0.122461	15.0904
GOTERM_BP_ALL	GO:0006793~phosphorus metabolic process	GO:0006793~phosphorus metabolic process	1.99689	25	9.32836	0.0100718	200846_S_AT, 202313_AT, 204015_S_AT, 204641_AT, 211080_S_AT, 204822_AT, 201577_AT, 215227_X_AT, 219148_AT, 209464_AT, 202199_S_AT, 205393_S_AT, 204886_AT, 203111_S_AT, 205394_AT, 1555758_A_AT, 238075_AT, 202240_AT, 200913_AT, 209642_AT, 205167_S_AT, 217324_AT, 203214_X_AT, 208854_S_AT, 210559_S_AT, 204887_S_AT, 209622_AT, 204267_X_AT, 209714_S_AT, 204695_AT, 201629_S_AT, 208300_AT	211	973	14116	1.71892	0.999999	0.123717	15.3735
GOTERM_BP_ALL	GO:0006796~phosphate metabolic process	GO:0006796~phosphate metabolic process	1.99689	25	9.32836	0.0100718	200846_S_AT, 202313_AT, 204015_S_AT, 204641_AT, 211080_S_AT, 204822_AT, 201577_AT, 215227_X_AT, 219148_AT, 209464_AT, 202199_S_AT, 205393_S_AT, 204886_AT, 203111_S_AT, 205394_AT, 1555758_A_AT, 238075_AT, 202240_AT, 200913_AT, 209642_AT, 205167_S_AT, 217324_AT, 203214_X_AT, 208854_S_AT, 210559_S_AT, 204887_S_AT, 209622_AT, 204267_X_AT, 209714_S_AT, 204695_AT, 201629_S_AT, 208300_AT	211	973	14116	1.71892	0.999999	0.123717	15.3735
GOTERM_BP_ALL	GO:0045787~positive regulation of cell cycle	GO:0045787~positive regulation of cell cycle	1.9928	5	1.86567	0.0101671	203764_AT, 219978_S_AT, 205046_AT, 202094_AT, 204817_AT, 218039_AT, 202095_S_AT, 38158_AT	211	57	14116	5.86846	0.999999	0.123746	15.5077
GOTERM_BP_ALL	GO:0051716~cellular response to stimulus	GO:0051716~cellular response to stimulus	1.97187	22	8.20896	0.0106693	211595_S_AT, 214426_X_AT, 213008_AT, 202996_AT, 223417_AT, 213007_AT, 213226_AT, 213344_S_AT, 201292_AT, 221539_AT, 215942_S_AT, 205393_S_AT, 205733_AT, 203418_AT, 218498_S_AT, 223785_AT, 205394_AT, 238075_AT, 205436_S_AT, 205024_S_AT, 203214_X_AT, 204768_S_AT, 210559_S_AT, 204603_AT, 203554_X_AT, 235588_AT, 202763_AT, 219502_AT, 204767_S_AT, 234465_AT, 235178_X_AT	211	820	14116	1.79489	1	0.128377	16.2117
GOTERM_BP_ALL	GO:0032268~regulation of cellular protein metabolic process	GO:0032268~regulation of cellular protein metabolic process	1.93888	15	5.59701	0.0115112	203111_S_AT, 216624_S_AT, 202954_AT, 202870_S_AT, 201457_X_AT, 203362_S_AT, 202240_AT, 204822_AT, 1554768_A_AT, 203214_X_AT, 203755_AT, 210559_S_AT, 209853_S_AT, 210186_S_AT, 214710_S_AT, 221539_AT, 213571_S_AT, 209393_S_AT	211	474	14116	2.1171	1	0.136678	17.3798
GOTERM_BP_ALL	GO:0034728~nucleosome organization	GO:0034728~nucleosome organization	1.90124	6	2.23881	0.0125534	204962_S_AT, 213911_S_AT, 213344_S_AT, 200853_AT, 218726_AT, 214426_X_AT, 218115_AT, 205436_S_AT	211	93	14116	4.31616	1	0.14694	18.8045
GOTERM_BP_ALL	GO:0007276~gamete generation	GO:0007276~gamete generation	1.8195	13	4.85075	0.0151532	203111_S_AT, 205394_AT, 206604_AT, 238075_AT, 208188_AT, 205436_S_AT, 210160_AT, 203554_X_AT, 213344_S_AT, 228323_AT, 218092_S_AT, 225609_AT, 205770_AT, 214710_S_AT, 1552680_A_AT, 205393_S_AT, 218115_AT, 222077_S_AT	211	395	14116	2.20179	1	0.173365	22.2586
GOTERM_BP_ALL	GO:0031572~G2/M transition DNA damage checkpoint	GO:0031572~G2/M transition DNA damage checkpoint	1.81182	3	1.1194	0.0154235	210559_S_AT, 213226_AT, 205733_AT, 203418_AT, 203214_X_AT	211	13	14116	15.4386	1	0.174788	22.6097
GOTERM_BP_ALL	GO:0051246~regulation of protein metabolic process	GO:0051246~regulation of protein metabolic process	1.78002	16	5.97015	0.0165953	203111_S_AT, 216624_S_AT, 202954_AT, 202870_S_AT, 201457_X_AT, 203362_S_AT, 202240_AT, 204822_AT, 1554768_A_AT, 203214_X_AT, 203755_AT, 210559_S_AT, 209853_S_AT, 210186_S_AT, 214710_S_AT, 221539_AT, 223229_AT, 213571_S_AT, 209393_S_AT	211	546	14116	1.96045	1	0.185381	24.1145
GOTERM_BP_ALL	GO:0006915~apoptosis	GO:0006915~apoptosis	1.74481	17	6.34328	0.0179965	1552648_A_AT, 203111_S_AT, 241640_AT, 216624_S_AT, 202535_AT, 212322_AT, 204817_AT, 221336_AT, 203755_AT, 241371_AT, 219787_S_AT, 223172_S_AT, 209853_S_AT, 201292_AT, 202763_AT, 234992_X_AT, 202094_AT, 228361_AT, 208300_AT, 202095_S_AT, 231775_AT, 38158_AT	211	602	14116	1.88922	1	0.197952	25.878
GOTERM_BP_ALL	GO:0032269~negative regulation of cellular protein metabolic process	GO:0032269~negative regulation of cellular protein metabolic process	1.74022	8	2.98507	0.0181876	203755_AT, 203362_S_AT, 201457_X_AT, 202870_S_AT, 202954_AT, 209853_S_AT, 210186_S_AT, 221539_AT, 1554768_A_AT	211	180	14116	2.97335	1	0.19832	26.1155
GOTERM_BP_ALL	GO:0044267~cellular protein metabolic process	GO:0044267~cellular protein metabolic process	1.72309	48	17.9104	0.0189197	225736_AT, 203362_S_AT, 204015_S_AT, 211595_S_AT, 204856_AT, 204641_AT, 203755_AT, 216251_S_AT, 215227_X_AT, 224535_S_AT, 223307_AT, 223229_AT, 202199_S_AT, 205393_S_AT, 213571_S_AT, 226175_AT, 201457_X_AT, 238075_AT, 202240_AT, 205167_S_AT, 201489_AT, 217324_AT, 210559_S_AT, 204887_S_AT, 210008_S_AT, 209622_AT, 219162_S_AT, 203931_S_AT, 201629_S_AT, 208300_AT, 200846_S_AT, 202313_AT, 202954_AT, …	211	2355	14116	1.36358	1	0.203938	27.0187
GOTERM_BP_ALL	GO:0051129~negative regulation of cellular component organization	GO:0051129~negative regulation of cellular component organization	1.71075	7	2.61194	0.019465	203362_S_AT, 221539_AT, 205046_AT, 209642_AT, 204817_AT, 207828_S_AT, 204822_AT, 1554768_A_AT, 38158_AT	211	142	14116	3.29791	1	0.207644	27.6846
GOTERM_BP_ALL	GO:0051053~negative regulation of DNA metabolic process	GO:0051053~negative regulation of DNA metabolic process	1.6985	4	1.49254	0.0200216	204126_S_AT, 203967_AT, 209832_S_AT, 203968_S_AT, 205733_AT, 228868_X_AT	211	39	14116	6.86159	1	0.211381	28.3586
GOTERM_BP_ALL	GO:0006310~DNA recombination	GO:0006310~DNA recombination	1.69367	6	2.23881	0.0202457	204603_AT, 213344_S_AT, 205394_AT, 238075_AT, 205393_S_AT, 205733_AT, 205436_S_AT, 234465_AT, 205024_S_AT	211	105	14116	3.82288	1	0.211934	28.6283
GOTERM_BP_ALL	GO:0051641~cellular localization	GO:0051641~cellular localization	1.68943	23	8.58209	0.0204441	218355_AT, 212166_AT, 241640_AT, 212313_AT, 222528_S_AT, 218357_S_AT, 231078_AT, 204817_AT, 219918_S_AT, 223907_S_AT, 204962_S_AT, 228053_S_AT, 221258_S_AT, 203764_AT, 219978_S_AT, 209464_AT, 202094_AT, 202095_S_AT, 239002_AT, 236906_X_AT, 218039_AT, 207828_S_AT, 201489_AT, 223478_AT, 208459_S_AT, 218092_S_AT, 205046_AT, 204026_S_AT, 224753_AT, 38158_AT	211	928	14116	1.65809	1	0.212238	28.8662
GOTERM_BP_ALL	GO:0031401~positive regulation of protein modification process	GO:0031401~positive regulation of protein modification process	1.6594	8	2.98507	0.0219078	210559_S_AT, 202870_S_AT, 202954_AT, 209853_S_AT, 210186_S_AT, 214710_S_AT, 202240_AT, 204822_AT, 203214_X_AT	211	187	14116	2.86205	1	0.224114	30.5988
GOTERM_BP_ALL	GO:0051248~negative regulation of protein metabolic process	GO:0051248~negative regulation of protein metabolic process	1.6594	8	2.98507	0.0219078	203755_AT, 203362_S_AT, 201457_X_AT, 202870_S_AT, 202954_AT, 209853_S_AT, 210186_S_AT, 221539_AT, 1554768_A_AT	211	187	14116	2.86205	1	0.224114	30.5988
GOTERM_BP_ALL	GO:0031576~G2/M transition checkpoint	GO:0031576~G2/M transition checkpoint	1.63741	3	1.1194	0.0230459	210559_S_AT, 213226_AT, 205733_AT, 203418_AT, 203214_X_AT	211	16	14116	12.5438	1	0.232742	31.9184
GOTERM_BP_ALL	GO:0032270~positive regulation of cellular protein metabolic process	GO:0032270~positive regulation of cellular protein metabolic process	1.62902	9	3.35821	0.0234952	210559_S_AT, 203111_S_AT, 202870_S_AT, 202954_AT, 209853_S_AT, 210186_S_AT, 214710_S_AT, 202240_AT, 204822_AT, 203214_X_AT	211	233	14116	2.58414	1	0.235091	32.4329
GOTERM_BP_ALL	GO:0051338~regulation of transferase activity	GO:0051338~regulation of transferase activity	1.62854	12	4.47761	0.023521	1552648_A_AT, 203111_S_AT, 1555758_A_AT, 205394_AT, 238075_AT, 203968_S_AT, 205167_S_AT, 223907_S_AT, 241371_AT, 204267_X_AT, 203967_AT, 209714_S_AT, 202763_AT, 204695_AT, 205046_AT, 205393_S_AT, 205733_AT, 231775_AT	211	372	14116	2.15808	1	0.233689	32.4623
GOTERM_BP_ALL	GO:0007127~meiosis I	GO:0007127~meiosis I	1.61348	4	1.49254	0.024351	205394_AT, 238075_AT, 206604_AT, 205393_S_AT, 204817_AT, 205024_S_AT, 38158_AT	211	42	14116	6.37147	1	0.239292	33.4028
GOTERM_BP_ALL	GO:0009132~nucleoside diphosphate metabolic process	GO:0009132~nucleoside diphosphate metabolic process	1.58726	3	1.1194	0.0258664	201577_AT, 209773_S_AT, 201890_AT, 203270_AT, 1553984_S_AT	211	17	14116	11.806	1	0.250598	35.0881
GOTERM_BP_ALL	GO:0051052~regulation of DNA metabolic process	GO:0051052~regulation of DNA metabolic process	1.55763	6	2.23881	0.0276929	204126_S_AT, 213344_S_AT, 203967_AT, 209832_S_AT, 203968_S_AT, 205733_AT, 205436_S_AT, 228868_X_AT, 205024_S_AT	211	114	14116	3.52108	1	0.26416	37.0661
GOTERM_BP_ALL	GO:0006511~ubiquitin-dependent protein catabolic process	GO:0006511~ubiquitin-dependent protein catabolic process	1.5437	9	3.35821	0.0285959	210559_S_AT, 203755_AT, 225736_AT, 203362_S_AT, 201457_X_AT, 202870_S_AT, 202954_AT, 209853_S_AT, 214710_S_AT, 1554768_A_AT, 203214_X_AT	211	242	14116	2.48803	1	0.269812	38.0231
GOTERM_BP_ALL	GO:0043412~biopolymer modification	GO:0043412~biopolymer modification	1.54347	33	12.3134	0.0286109	225736_AT, 200846_S_AT, 202954_AT, 202313_AT, 204015_S_AT, 217962_AT, 204641_AT, 204856_AT, 229751_S_AT, 211080_S_AT, 204822_AT, 216251_S_AT, 215227_X_AT, 219148_AT, 202199_S_AT, 223229_AT, 209464_AT, 205393_S_AT, 218498_S_AT, 208101_S_AT, 204886_AT, 203111_S_AT, 216624_S_AT, 205394_AT, 238075_AT, 202240_AT, 200913_AT, 209642_AT, 205167_S_AT, 217324_AT, 203214_X_AT, 208854_S_AT, 210559_S_AT, 2048…	211	1526	14116	1.44673	1	0.268179	38.0388
GOTERM_BP_ALL	GO:0051649~establishment of localization in cell	GO:0051649~establishment of localization in cell	1.5371	21	7.83582	0.0290337	212166_AT, 218355_AT, 241640_AT, 212313_AT, 236906_X_AT, 222528_S_AT, 218357_S_AT, 204817_AT, 218039_AT, 231078_AT, 207828_S_AT, 201489_AT, 223478_AT, 223907_S_AT, 204962_S_AT, 221258_S_AT, 228053_S_AT, 203764_AT, 208459_S_AT, 219978_S_AT, 218092_S_AT, 205046_AT, 202094_AT, 204026_S_AT, 224753_AT, 202095_S_AT, 38158_AT	211	852	14116	1.64896	1	0.269846	38.482
GOTERM_BP_ALL	GO:0051247~positive regulation of protein metabolic process	GO:0051247~positive regulation of protein metabolic process	1.53665	9	3.35821	0.0290637	210559_S_AT, 203111_S_AT, 202870_S_AT, 202954_AT, 209853_S_AT, 210186_S_AT, 214710_S_AT, 202240_AT, 204822_AT, 203214_X_AT	211	243	14116	2.4778	1	0.268358	38.5134
GOTERM_BP_ALL	GO:0051782~negative regulation of cell division	GO:0051782~negative regulation of cell division	1.52969	2	0.746269	0.0295332	239002_AT, 205733_AT, 219918_S_AT	211	2	14116	66.9005	1	0.27037	39.0018
GOTERM_BP_ALL	GO:0007079~mitotic chromosome movement towards spindle pole	GO:0007079~mitotic chromosome movement towards spindle pole	1.52969	2	0.746269	0.0295332	203764_AT, 205046_AT	211	2	14116	66.9005	1	0.27037	39.0018
GOTERM_BP_ALL	GO:0032504~multicellular organism reproduction	GO:0032504~multicellular organism reproduction	1.51643	14	5.22388	0.0304489	203111_S_AT, 205394_AT, 206604_AT, 238075_AT, 208188_AT, 205436_S_AT, 210160_AT, 201577_AT, 203554_X_AT, 213344_S_AT, 228323_AT, 218092_S_AT, 225609_AT, 205770_AT, 214710_S_AT, 1552680_A_AT, 205393_S_AT, 218115_AT, 222077_S_AT	211	487	14116	1.92322	1	0.275834	39.9439
GOTERM_BP_ALL	GO:0048609~reproductive process in a multicellular organism	GO:0048609~reproductive process in a multicellular organism	1.51643	14	5.22388	0.0304489	203111_S_AT, 205394_AT, 206604_AT, 238075_AT, 208188_AT, 205436_S_AT, 210160_AT, 201577_AT, 203554_X_AT, 213344_S_AT, 228323_AT, 218092_S_AT, 225609_AT, 205770_AT, 214710_S_AT, 1552680_A_AT, 205393_S_AT, 218115_AT, 222077_S_AT	211	487	14116	1.92322	1	0.275834	39.9439
GOTERM_BP_ALL	GO:0000724~double-strand break repair via homologous recombination	GO:0000724~double-strand break repair via homologous recombination	1.49622	3	1.1194	0.0318991	213344_S_AT, 205733_AT, 205436_S_AT, 205024_S_AT	211	19	14116	10.5632	1	0.285284	41.4081
GOTERM_BP_ALL	GO:0000725~recombinational repair	GO:0000725~recombinational repair	1.49622	3	1.1194	0.0318991	213344_S_AT, 205733_AT, 205436_S_AT, 205024_S_AT	211	19	14116	10.5632	1	0.285284	41.4081
GOTERM_BP_ALL	GO:0045859~regulation of protein kinase activity	GO:0045859~regulation of protein kinase activity	1.47033	11	4.10448	0.0338588	1552648_A_AT, 203111_S_AT, 1555758_A_AT, 205394_AT, 238075_AT, 203968_S_AT, 205167_S_AT, 241371_AT, 204267_X_AT, 203967_AT, 209714_S_AT, 202763_AT, 204695_AT, 205046_AT, 205393_S_AT, 205733_AT, 231775_AT	211	345	14116	2.13306	1	0.298306	43.3336
GOTERM_BP_ALL	GO:0010638~positive regulation of organelle organization	GO:0010638~positive regulation of organelle organization	1.4536	5	1.86567	0.0351887	204887_S_AT, 204886_AT, 203764_AT, 219978_S_AT, 205046_AT, 204817_AT, 218039_AT, 38158_AT	211	83	14116	4.03015	1	0.306328	44.6062
GOTERM_BP_ALL	GO:0000086~G2/M transition of mitotic cell cycle	GO:0000086~G2/M transition of mitotic cell cycle	1.41539	3	1.1194	0.0384245	205394_AT, 238075_AT, 214710_S_AT, 202094_AT, 205393_S_AT, 202095_S_AT	211	21	14116	9.55721	1	0.327785	47.5913
GOTERM_BP_ALL	GO:0008219~cell death	GO:0008219~cell death	1.39771	18	6.71642	0.0400216	1552648_A_AT, 203111_S_AT, 241640_AT, 216624_S_AT, 202535_AT, 212322_AT, 204817_AT, 221336_AT, 203755_AT, 241371_AT, 219787_S_AT, 223172_S_AT, 209853_S_AT, 201292_AT, 202763_AT, 234992_X_AT, 201251_AT, 202094_AT, 228361_AT, 208300_AT, 202095_S_AT, 231775_AT, 38158_AT	211	719	14116	1.67484	1	0.33706	49.0083
GOTERM_BP_ALL	GO:0007283~spermatogenesis	GO:0007283~spermatogenesis	1.38569	10	3.73134	0.041144	208188_AT, 206604_AT, 205436_S_AT, 210160_AT, 203554_X_AT, 213344_S_AT, 228323_AT, 218092_S_AT, 225609_AT, 205770_AT, 1552680_A_AT, 218115_AT, 222077_S_AT	211	308	14116	2.17209	1	0.342852	49.9826
GOTERM_BP_ALL	GO:0048232~male gamete generation	GO:0048232~male gamete generation	1.38569	10	3.73134	0.041144	208188_AT, 206604_AT, 205436_S_AT, 210160_AT, 203554_X_AT, 213344_S_AT, 228323_AT, 218092_S_AT, 225609_AT, 205770_AT, 1552680_A_AT, 218115_AT, 222077_S_AT	211	308	14116	2.17209	1	0.342852	49.9826
GOTERM_BP_ALL	GO:0043549~regulation of kinase activity	GO:0043549~regulation of kinase activity	1.3854	11	4.10448	0.0411717	1552648_A_AT, 203111_S_AT, 1555758_A_AT, 205394_AT, 238075_AT, 203968_S_AT, 205167_S_AT, 241371_AT, 204267_X_AT, 203967_AT, 209714_S_AT, 202763_AT, 204695_AT, 205046_AT, 205393_S_AT, 205733_AT, 231775_AT	211	357	14116	2.06136	1	0.341095	50.0064
GOTERM_BP_ALL	GO:0006333~chromatin assembly or disassembly	GO:0006333~chromatin assembly or disassembly	1.38513	6	2.23881	0.0411975	204962_S_AT, 213911_S_AT, 213344_S_AT, 200853_AT, 218726_AT, 214426_X_AT, 218115_AT, 205436_S_AT	211	127	14116	3.16065	1	0.339345	50.0286
GOTERM_BP_ALL	GO:0019953~sexual reproduction	GO:0019953~sexual reproduction	1.38095	13	4.85075	0.0415963	203111_S_AT, 205394_AT, 206604_AT, 238075_AT, 208188_AT, 205436_S_AT, 210160_AT, 203554_X_AT, 213344_S_AT, 228323_AT, 218092_S_AT, 225609_AT, 205770_AT, 214710_S_AT, 1552680_A_AT, 205393_S_AT, 218115_AT, 222077_S_AT	211	458	14116	1.89892	1	0.340132	50.3702
GOTERM_BP_ALL	GO:0048015~phosphoinositide-mediated signaling	GO:0048015~phosphoinositide-mediated signaling	1.37463	5	1.86567	0.0422055	203755_AT, 202954_AT, 201292_AT, 204767_S_AT, 204026_S_AT, 204768_S_AT	211	88	14116	3.80116	1	0.342314	50.8879
GOTERM_BP_ALL	GO:0016265~death	GO:0016265~death	1.37404	18	6.71642	0.0422625	1552648_A_AT, 203111_S_AT, 241640_AT, 216624_S_AT, 202535_AT, 212322_AT, 204817_AT, 221336_AT, 203755_AT, 241371_AT, 219787_S_AT, 223172_S_AT, 209853_S_AT, 201292_AT, 202763_AT, 234992_X_AT, 201251_AT, 202094_AT, 228361_AT, 208300_AT, 202095_S_AT, 231775_AT, 38158_AT	211	724	14116	1.66327	1	0.340802	50.936
GOTERM_BP_ALL	GO:0051382~kinetochore assembly	GO:0051382~kinetochore assembly	1.35682	2	0.746269	0.0439726	205046_AT, 207828_S_AT	211	3	14116	44.6003	1	0.350158	52.3608
GOTERM_BP_ALL	GO:0051305~chromosome movement towards spindle pole	GO:0051305~chromosome movement towards spindle pole	1.35682	2	0.746269	0.0439726	203764_AT, 205046_AT	211	3	14116	44.6003	1	0.350158	52.3608
GOTERM_BP_ALL	GO:0042325~regulation of phosphorylation	GO:0042325~regulation of phosphorylation	1.33573	13	4.85075	0.0461604	1552648_A_AT, 203111_S_AT, 205394_AT, 1555758_A_AT, 238075_AT, 205167_S_AT, 203968_S_AT, 204822_AT, 241371_AT, 204267_X_AT, 203967_AT, 210186_S_AT, 209714_S_AT, 202763_AT, 205046_AT, 204695_AT, 205393_S_AT, 205733_AT, 231775_AT	211	466	14116	1.86632	1	0.362324	54.127
GOTERM_BP_ALL	GO:0043687~post-translational protein modification	GO:0043687~post-translational protein modification	1.3326	26	9.70149	0.0464944	200846_S_AT, 202954_AT, 202313_AT, 204015_S_AT, 204641_AT, 211080_S_AT, 204822_AT, 215227_X_AT, 219148_AT, 202199_S_AT, 223229_AT, 209464_AT, 205393_S_AT, 218498_S_AT, 204886_AT, 203111_S_AT, 205394_AT, 238075_AT, 202240_AT, 200913_AT, 205167_S_AT, 209642_AT, 217324_AT, 208854_S_AT, 203214_X_AT, 210559_S_AT, 204887_S_AT, 209622_AT, 204267_X_AT, 204695_AT, 201629_S_AT, 208300_AT	211	1182	14116	1.47158	1	0.362511	54.3912
GOTERM_BP_ALL	GO:0016071~mRNA metabolic process	GO:0016071~mRNA metabolic process	1.29965	11	4.10448	0.0501589	214941_S_AT, 205644_S_AT, 203534_AT, 218774_AT, 1555751_A_AT, 216977_X_AT, 204459_AT, 202199_S_AT, 214698_AT, 223416_AT, 203664_S_AT, 222821_S_AT	211	370	14116	1.98893	1	0.383308	57.197
GOTERM_BP_ALL	GO:0006397~mRNA processing	GO:0006397~mRNA processing	1.29321	10	3.73134	0.0509082	214941_S_AT, 205644_S_AT, 203534_AT, 1555751_A_AT, 216977_X_AT, 204459_AT, 202199_S_AT, 214698_AT, 223416_AT, 203664_S_AT, 222821_S_AT	211	321	14116	2.08413	1	0.38587	57.7504
GOTERM_BP_ALL	GO:0043086~negative regulation of catalytic activity	GO:0043086~negative regulation of catalytic activity	1.25036	9	3.35821	0.0561875	203755_AT, 203362_S_AT, 201457_X_AT, 202870_S_AT, 202954_AT, 209853_S_AT, 210186_S_AT, 202763_AT, 202094_AT, 1554768_A_AT, 202095_S_AT	211	277	14116	2.17366	1	0.414944	61.4631
GOTERM_BP_ALL	GO:0031536~positive regulation of exit from mitosis	GO:0031536~positive regulation of exit from mitosis	1.23509	2	0.746269	0.0581982	202954_AT, 202094_AT, 202095_S_AT	211	4	14116	33.4502	1	0.424309	62.7948
GOTERM_BP_ALL	GO:0007019~microtubule depolymerization	GO:0007019~microtubule depolymerization	1.23509	2	0.746269	0.0581982	221258_S_AT, 211519_S_AT, 209408_AT	211	4	14116	33.4502	1	0.424309	62.7948
GOTERM_BP_ALL	GO:0051261~protein depolymerization	GO:0051261~protein depolymerization	1.23509	2	0.746269	0.0581982	221258_S_AT, 211519_S_AT, 209408_AT	211	4	14116	33.4502	1	0.424309	62.7948
GOTERM_BP_ALL	GO:0051383~kinetochore organization	GO:0051383~kinetochore organization	1.23509	2	0.746269	0.0581982	205046_AT, 207828_S_AT	211	4	14116	33.4502	1	0.424309	62.7948
GOTERM_BP_ALL	GO:0007095~mitotic cell cycle G2/M transition DNA damage checkpoint	GO:0007095~mitotic cell cycle G2/M transition DNA damage checkpoint	1.23509	2	0.746269	0.0581982	210559_S_AT, 213226_AT, 203418_AT, 203214_X_AT	211	4	14116	33.4502	1	0.424309	62.7948
GOTERM_BP_ALL	GO:0051299~centrosome separation	GO:0051299~centrosome separation	1.23509	2	0.746269	0.0581982	204641_AT, 204444_AT, 211080_S_AT	211	4	14116	33.4502	1	0.424309	62.7948
GOTERM_BP_ALL	GO:0009186~deoxyribonucleoside diphosphate metabolic process	GO:0009186~deoxyribonucleoside diphosphate metabolic process	1.23509	2	0.746269	0.0581982	209773_S_AT, 201890_AT, 203270_AT, 1553984_S_AT	211	4	14116	33.4502	1	0.424309	62.7948
GOTERM_BP_ALL	GO:0051174~regulation of phosphorus metabolic process	GO:0051174~regulation of phosphorus metabolic process	1.22911	13	4.85075	0.0590047	1552648_A_AT, 203111_S_AT, 205394_AT, 1555758_A_AT, 238075_AT, 205167_S_AT, 203968_S_AT, 204822_AT, 241371_AT, 204267_X_AT, 203967_AT, 210186_S_AT, 209714_S_AT, 202763_AT, 205046_AT, 204695_AT, 205393_S_AT, 205733_AT, 231775_AT	211	485	14116	1.79321	1	0.426752	63.3167
GOTERM_BP_ALL	GO:0019220~regulation of phosphate metabolic process	GO:0019220~regulation of phosphate metabolic process	1.22911	13	4.85075	0.0590047	1552648_A_AT, 203111_S_AT, 205394_AT, 1555758_A_AT, 238075_AT, 205167_S_AT, 203968_S_AT, 204822_AT, 241371_AT, 204267_X_AT, 203967_AT, 210186_S_AT, 209714_S_AT, 202763_AT, 205046_AT, 204695_AT, 205393_S_AT, 205733_AT, 231775_AT	211	485	14116	1.79321	1	0.426752	63.3167
GOTERM_BP_ALL	GO:0008380~RNA splicing	GO:0008380~RNA splicing	1.20573	9	3.35821	0.0622687	214941_S_AT, 205644_S_AT, 203534_AT, 1555751_A_AT, 216977_X_AT, 204459_AT, 202199_S_AT, 223416_AT, 203664_S_AT, 222821_S_AT	211	284	14116	2.12009	1	0.442578	65.3594
GOTERM_BP_ALL	GO:0044092~negative regulation of molecular function	GO:0044092~negative regulation of molecular function	1.20536	10	3.73134	0.0623216	203755_AT, 203362_S_AT, 201457_X_AT, 202870_S_AT, 202954_AT, 209853_S_AT, 210186_S_AT, 202763_AT, 202094_AT, 1554768_A_AT, 224314_S_AT, 202095_S_AT	211	334	14116	2.00301	1	0.440771	65.3916
GOTERM_BP_ALL	GO:0006302~double-strand break repair	GO:0006302~double-strand break repair	1.18834	4	1.49254	0.0648122	213344_S_AT, 204767_S_AT, 205733_AT, 205436_S_AT, 205024_S_AT, 204768_S_AT	211	62	14116	4.31616	1	0.451937	66.8767
GOTERM_BP_ALL	GO:0006275~regulation of DNA replication	GO:0006275~regulation of DNA replication	1.18834	4	1.49254	0.0648122	204126_S_AT, 203967_AT, 209832_S_AT, 203968_S_AT, 205733_AT, 228868_X_AT	211	62	14116	4.31616	1	0.451937	66.8767
GOTERM_BP_ALL	GO:0006351~transcription, DNA-dependent	GO:0006351~transcription, DNA-dependent	1.14913	9	3.35821	0.0709372	202580_X_AT, 202680_AT, 216624_S_AT, 203554_X_AT, 228361_AT, 203931_S_AT, 221336_AT, 203664_S_AT, 208361_S_AT	211	292	14116	2.062	1	0.481158	70.2781
GOTERM_BP_ALL	GO:0000089~mitotic metaphase	GO:0000089~mitotic metaphase	1.14138	2	0.746269	0.0722131	221520_S_AT, 205046_AT	211	5	14116	26.7602	1	0.485319	70.944
GOTERM_BP_ALL	GO:0009057~macromolecule catabolic process	GO:0009057~macromolecule catabolic process	1.12787	18	6.71642	0.0744958	208101_S_AT, 225736_AT, 202954_AT, 202870_S_AT, 201457_X_AT, 203362_S_AT, 223417_AT, 1554768_A_AT, 204768_S_AT, 203214_X_AT, 203755_AT, 210559_S_AT, 221436_S_AT, 218774_AT, 209853_S_AT, 203022_AT, 223307_AT, 210186_S_AT, 214710_S_AT, 202763_AT, 204767_S_AT, 223229_AT	211	781	14116	1.54188	1	0.494269	72.1006
GOTERM_BP_ALL	GO:0044265~cellular macromolecule catabolic process	GO:0044265~cellular macromolecule catabolic process	1.12701	17	6.34328	0.0746434	208101_S_AT, 225736_AT, 202954_AT, 202870_S_AT, 201457_X_AT, 203362_S_AT, 223417_AT, 1554768_A_AT, 204768_S_AT, 203214_X_AT, 203755_AT, 210559_S_AT, 221436_S_AT, 218774_AT, 209853_S_AT, 203022_AT, 223307_AT, 214710_S_AT, 202763_AT, 204767_S_AT, 223229_AT	211	725	14116	1.5687	1	0.492831	72.1739
GOTERM_BP_ALL	GO:0032774~RNA biosynthetic process	GO:0032774~RNA biosynthetic process	1.12362	9	3.35821	0.0752284	202580_X_AT, 202680_AT, 216624_S_AT, 203554_X_AT, 228361_AT, 203931_S_AT, 221336_AT, 203664_S_AT, 208361_S_AT	211	296	14116	2.03414	1	0.493495	72.4626
GOTERM_BP_ALL	GO:0000375~RNA splicing, via transesterification reactions	GO:0000375~RNA splicing, via transesterification reactions	1.10558	6	2.23881	0.0784185	205644_S_AT, 1555751_A_AT, 216977_X_AT, 204459_AT, 223416_AT, 203664_S_AT, 222821_S_AT	211	153	14116	2.62355	1	0.506345	73.9878
GOTERM_BP_ALL	GO:0000377~RNA splicing, via transesterification reactions with bulged adenosine as nucleophile	GO:0000377~RNA splicing, via transesterification reactions with bulged adenosine as nucleophile	1.10558	6	2.23881	0.0784185	205644_S_AT, 1555751_A_AT, 216977_X_AT, 204459_AT, 223416_AT, 203664_S_AT, 222821_S_AT	211	153	14116	2.62355	1	0.506345	73.9878
GOTERM_BP_ALL	GO:0000398~nuclear mRNA splicing, via spliceosome	GO:0000398~nuclear mRNA splicing, via spliceosome	1.10558	6	2.23881	0.0784185	205644_S_AT, 1555751_A_AT, 216977_X_AT, 204459_AT, 223416_AT, 203664_S_AT, 222821_S_AT	211	153	14116	2.62355	1	0.506345	73.9878
GOTERM_BP_ALL	GO:0006839~mitochondrial transport	GO:0006839~mitochondrial transport	1.07884	4	1.49254	0.083398	228053_S_AT, 222528_S_AT, 218357_S_AT, 231078_AT, 201489_AT, 223478_AT	211	69	14116	3.87829	1	0.526764	76.2109
GOTERM_BP_ALL	GO:0007089~traversing start control point of mitotic cell cycle	GO:0007089~traversing start control point of mitotic cell cycle	1.0654	2	0.746269	0.0860204	203967_AT, 205167_S_AT, 203968_S_AT	211	6	14116	22.3002	1	0.536103	77.3087
GOTERM_BP_ALL	GO:0001675~acrosome assembly	GO:0001675~acrosome assembly	1.0654	2	0.746269	0.0860204	228323_AT, 218092_S_AT, 1552680_A_AT	211	6	14116	22.3002	1	0.536103	77.3087
GOTERM_BP_ALL	GO:0006464~protein modification process	GO:0006464~protein modification process	1.0346	29	10.8209	0.0923429	225736_AT, 200846_S_AT, 202954_AT, 202313_AT, 204015_S_AT, 204641_AT, 204856_AT, 211080_S_AT, 204822_AT, 216251_S_AT, 215227_X_AT, 219148_AT, 202199_S_AT, 223229_AT, 209464_AT, 205393_S_AT, 218498_S_AT, 204886_AT, 203111_S_AT, 205394_AT, 238075_AT, 202240_AT, 200913_AT, 205167_S_AT, 209642_AT, 217324_AT, 208854_S_AT, 203214_X_AT, 210559_S_AT, 204887_S_AT, 209622_AT, 204267_X_AT, 204695_AT, 201629…	211	1453	14116	1.33525	1	0.560618	79.7629
GOTERM_BP_ALL	GO:0019538~protein metabolic process	GO:0019538~protein metabolic process	1.03185	51	19.0299	0.0929289	201943_S_AT, 225736_AT, 203362_S_AT, 204015_S_AT, 204641_AT, 204856_AT, 211595_S_AT, 203755_AT, 216251_S_AT, 215227_X_AT, 224535_S_AT, 223307_AT, 202199_S_AT, 223229_AT, 201940_AT, 205393_S_AT, 213571_S_AT, 226175_AT, 201457_X_AT, 238075_AT, 202240_AT, 205167_S_AT, 201489_AT, 217324_AT, 210559_S_AT, 204887_S_AT, 209622_AT, 210008_S_AT, 219162_S_AT, 202763_AT, 203931_S_AT, 201629_S_AT, 208300_AT, …	211	2812	14116	1.21334	1	0.560848	79.9772
GOTERM_BP_ALL	GO:0043623~cellular protein complex assembly	GO:0043623~cellular protein complex assembly	1.02663	6	2.23881	0.0940532	212166_AT, 203111_S_AT, 208459_S_AT, 236906_X_AT, 210186_S_AT, 205046_AT, 207828_S_AT	211	162	14116	2.4778	1	0.563258	80.3826
GOTERM_BP_ALL	GO:0051323~metaphase	GO:0051323~metaphase	1.00164	2	0.746269	0.0996233	221520_S_AT, 205046_AT	211	7	14116	19.1144	1	0.583109	82.2795

## Sheet: Note
There were 348 LOC389641 positively-correlated genes (n = 226, r = 0.46, p < 0.001).
Analysis of biological processes with DAVID using these 348 genes,
